# Supplementary material for: Movements of free-range pigs in rural communities in Zambia: an explorative study towards future ring interventions for the control of Taenia solium
Source: PubMed Central journal article supplement (PMC9044682; doi:10.1186/s13071-022-05264-0), 2022-04-27

## Additional file 2: GPS tracks and summary data of individual pigs

This document contains the GPS tracks and summary data of the 43 pigs used in the final analysis set. The summary table shows the residence time (in hours) within circles of different radii around the pig owner's household. Also the proportion of the total tracking time (in %) and the number of different visits outside the ring are shown.

The histogram shows the number of data points at different distances away from the pig owner's household.

The household coordinate of the pig's owner is indicated with a green dot. The tracks are shown using a different color per day. The rings are presented as circles of different radii around the pig owner's household (50-m ring with a solid line, 100-m ring with a dashed line and 250-m ring with a dotted line).

**Fig 1**

|              |                |
|--------------|----------------|
| Neighborhood | Neighborhood A |
| Season       | October        |
| Sex          | F              |
| Age (months) | 14             |

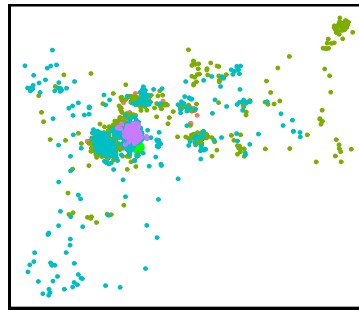

- 2019-10-23
- 2019-10-24
- 2019-10-25
- 2019-10-26

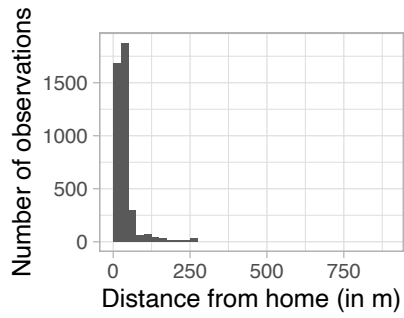

| Radius | Residence time | Proportion of total time | Number of visits |
|--------|----------------|--------------------------|------------------|
| 50m    | 61.9 h         | 14%                      | 48               |
| 100m   | 68.5 h         | 4.9%                     | 15               |
| 150m   | 70.3 h         | 2.3%                     | 6                |
| 200m   | 71 h           | 1.4%                     | 2                |
| 250m   | 71.4 h         | 0.8%                     | 1                |

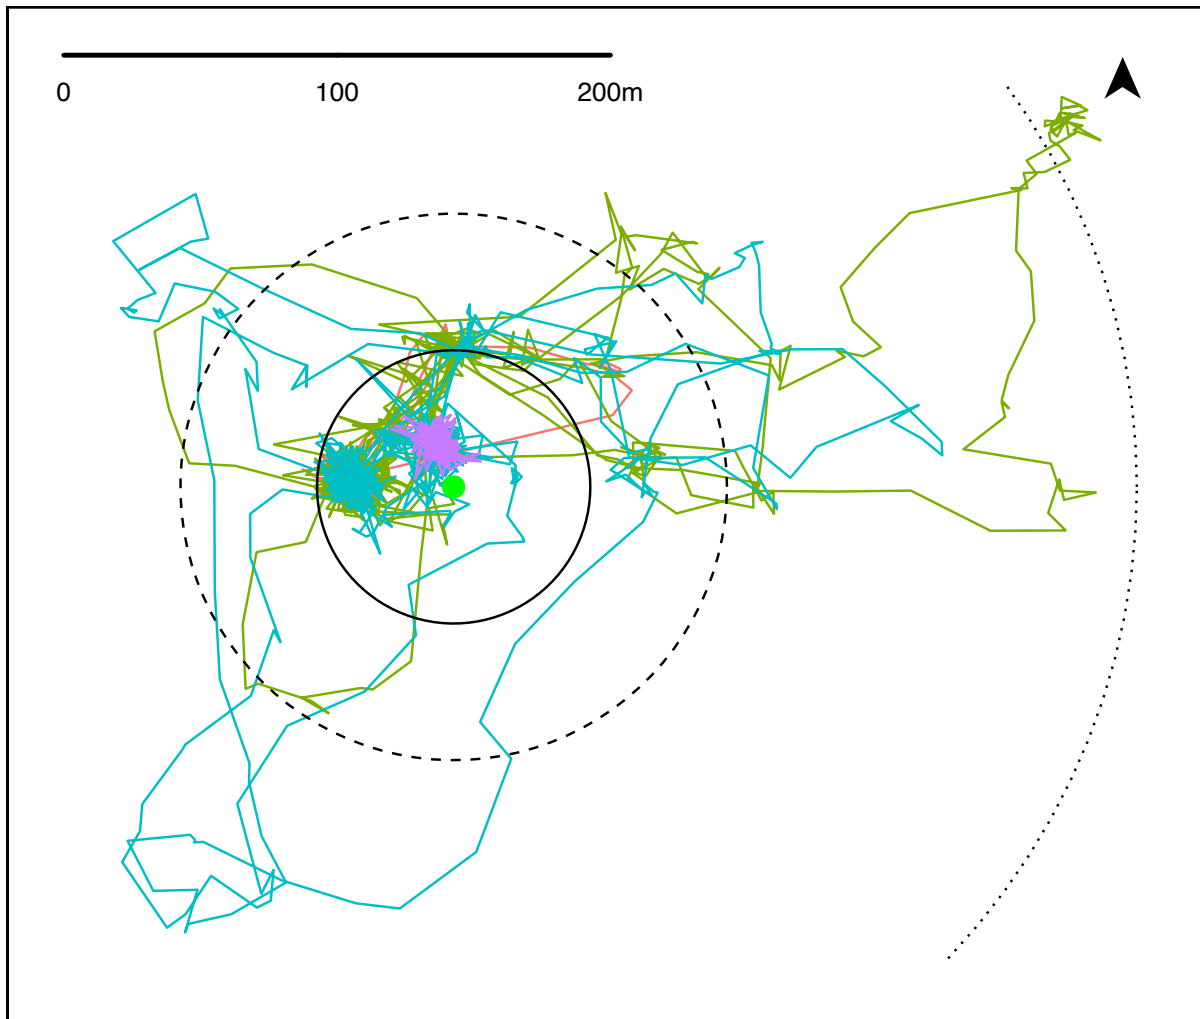

**Fig 2**

|              |                |
|--------------|----------------|
| Neighborhood | Neighborhood A |
| Season       | October        |
| Sex          | F              |
| Age (months) | 10             |

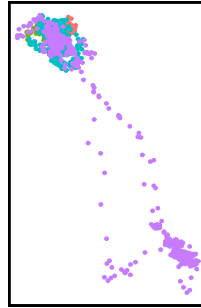

- 2019-10-23
- 2019-10-24
- 2019-10-25
- 2019-10-26

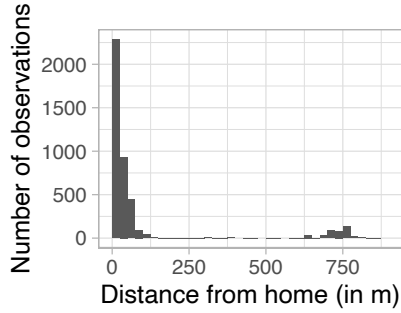

| Radius | Residence time | Proportion of total time | Number of visits |
|--------|----------------|--------------------------|------------------|
| 50m    | 55.1 h         | 23.5%                    | 76               |
| 100m   | 63.9 h         | 11.2%                    | 11               |
| 150m   | 64.7 h         | 10.1%                    | 2                |
| 200m   | 64.8 h         | 10%                      | 2                |
| 250m   | 64.9 h         | 9.9%                     | 2                |

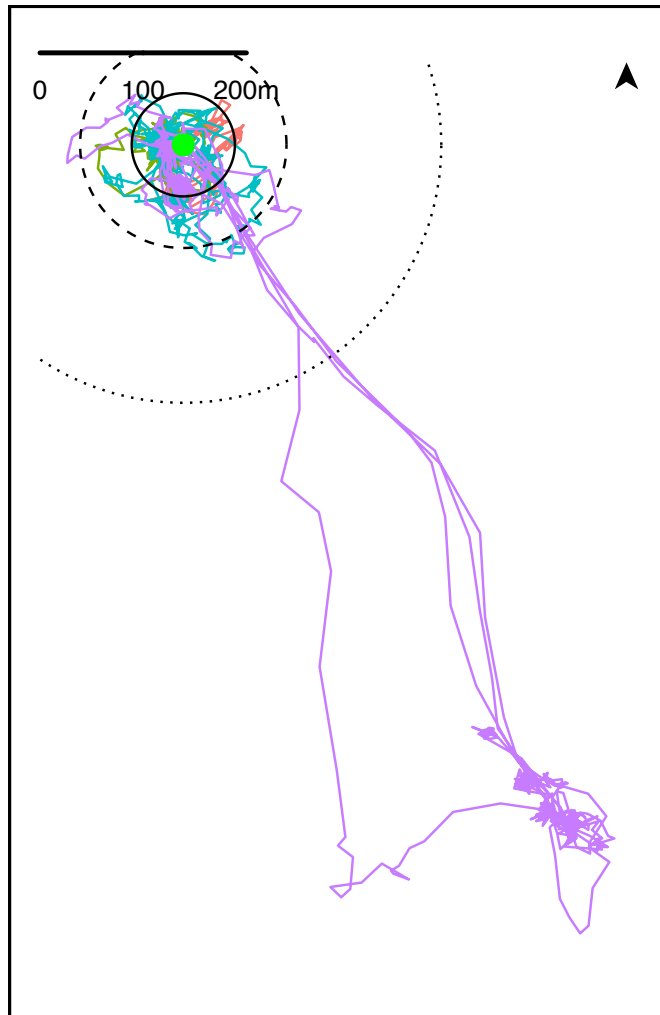

**Fig 3**

|              |                |
|--------------|----------------|
| Neighborhood | Neighborhood A |
| Season       | October        |
| Sex          | F              |
| Age (months) | 8              |

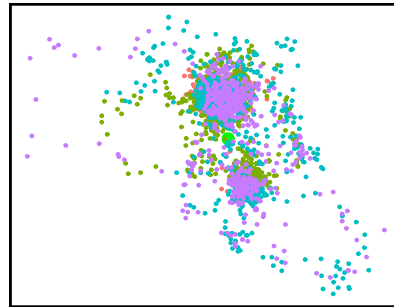

- 2019-10-23
- 2019-10-24
- 2019-10-25
- 2019-10-26

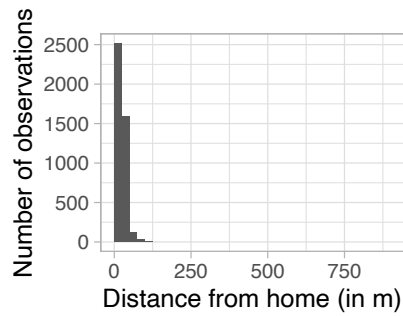

| Radius | Residence time | Proportion of total time | Number of visits |
|--------|----------------|--------------------------|------------------|
| 50m    | 67.9 h         | 3.5%                     | 18               |
| 100m   | 70.2 h         | 0.2%                     | 3                |
| 150m   | 70.4 h         | 0%                       | 0                |
| 200m   | 70.4 h         | 0%                       | 0                |
| 250m   | 70.4 h         | 0%                       | 0                |

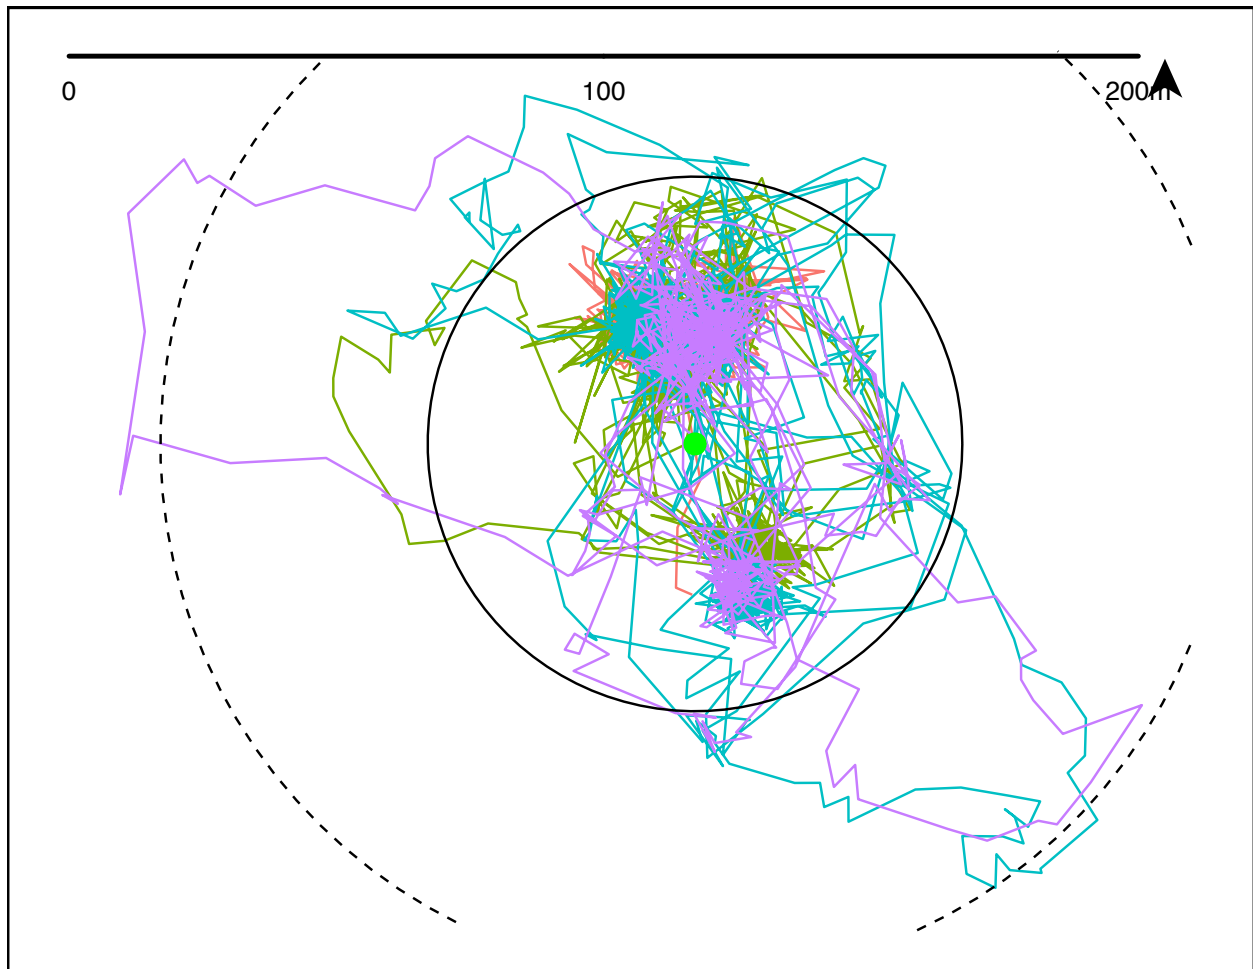

**Fig 4**

|              |                |
|--------------|----------------|
| Neighborhood | Neighborhood A |
| Season       | October        |
| Sex          | F              |
| Age (months) | 6              |

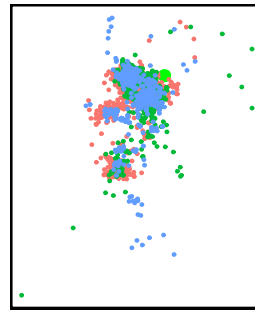

• 2019-10-23  
 • 2019-10-24  
 • 2019-10-25

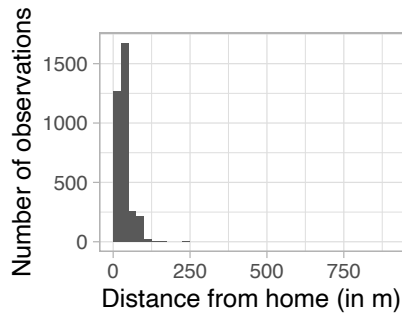

| Radius | Residence time | Proportion of total time | Number of visits |
|--------|----------------|--------------------------|------------------|
| 50m    | 55.3 h         | 14.9%                    | 32               |
| 100m   | 64.3 h         | 1%                       | 9                |
| 150m   | 64.8 h         | 0.2%                     | 3                |
| 200m   | 64.9 h         | 0.1%                     | 1                |
| 250m   | 64.9 h         | 0%                       | 0                |

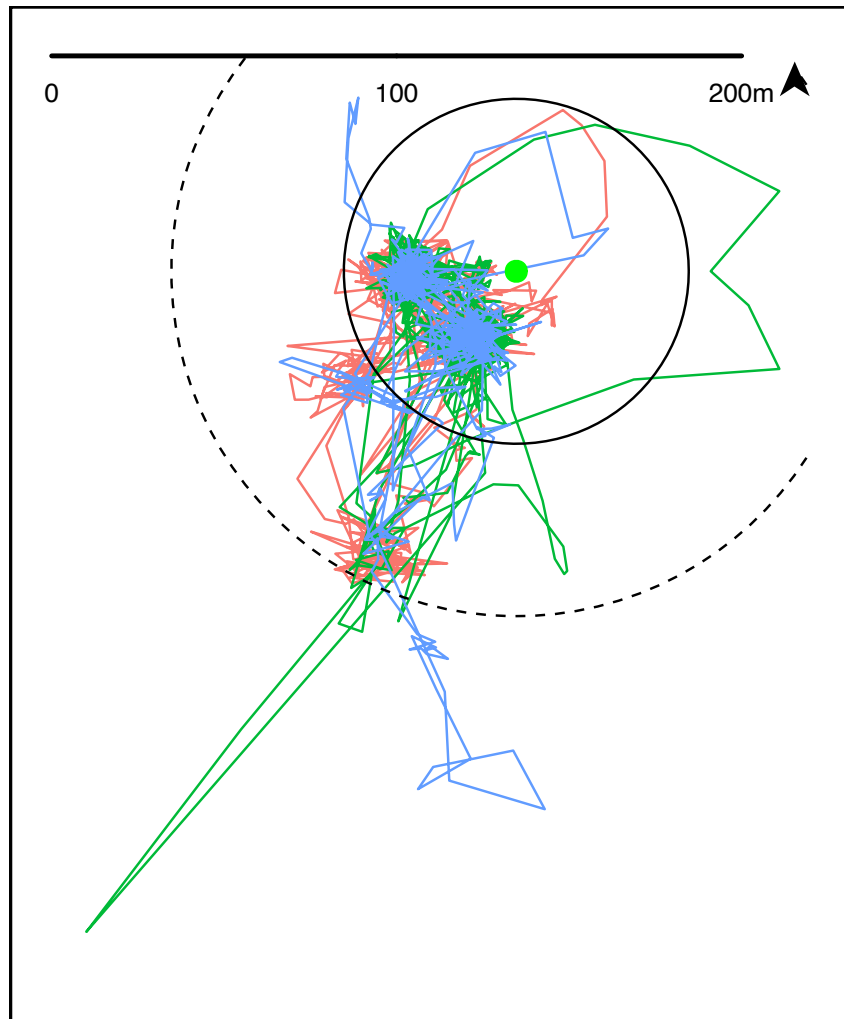

**Fig 5**

|              |                |
|--------------|----------------|
| Neighborhood | Neighborhood A |
| Season       | October        |
| Sex          | M              |
| Age (months) | 5              |

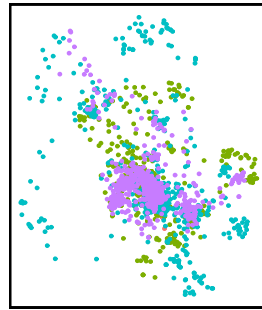

- 2019-10-23
- 2019-10-24
- 2019-10-25
- 2019-10-26

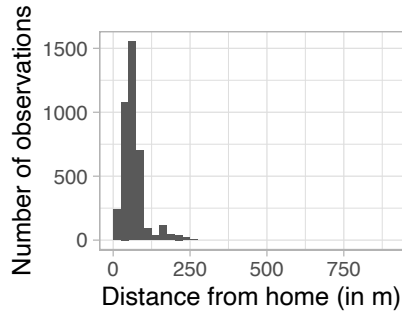

| Radius | Residence time | Proportion of total time | Number of visits |
|--------|----------------|--------------------------|------------------|
| 50m    | 24 h           | 64.7%                    | 185              |
| 100m   | 62.1 h         | 8.6%                     | 26               |
| 150m   | 64.2 h         | 5.5%                     | 11               |
| 200m   | 66.8 h         | 1.6%                     | 3                |
| 250m   | 67.8 h         | 0.2%                     | 3                |

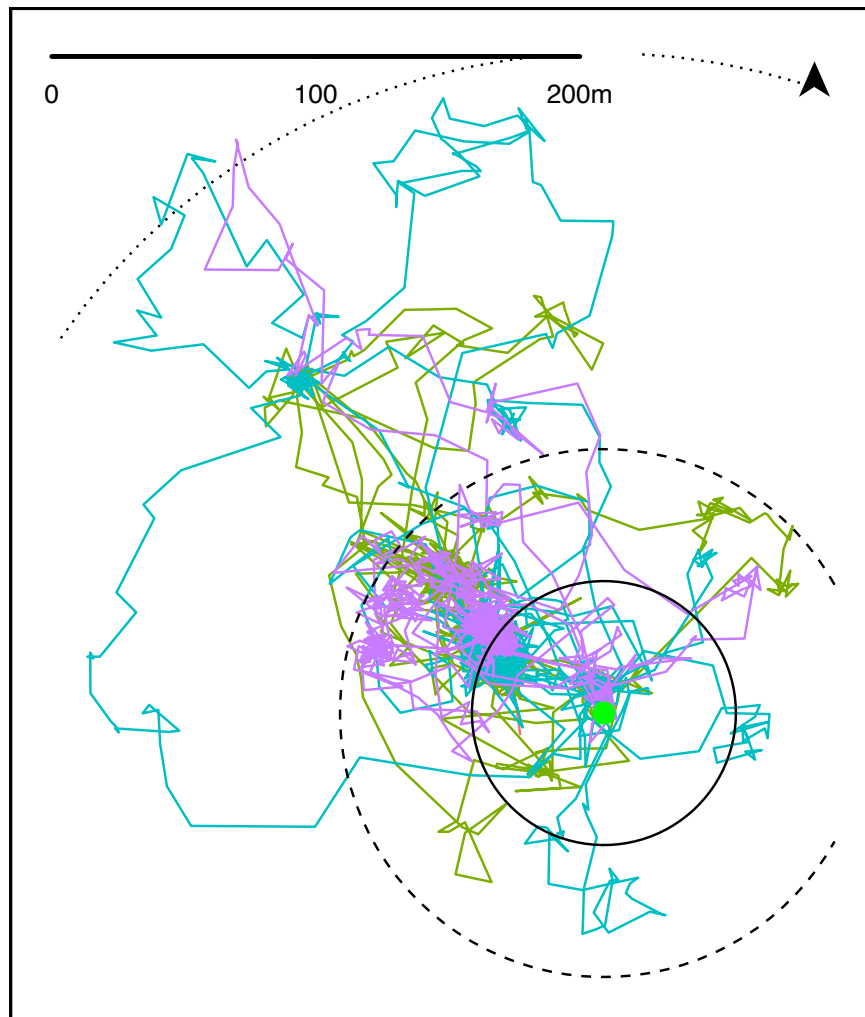

**Fig 6**

|              |                |
|--------------|----------------|
| Neighborhood | Neighborhood A |
| Season       | October        |
| Sex          | F              |
| Age (months) | 21             |

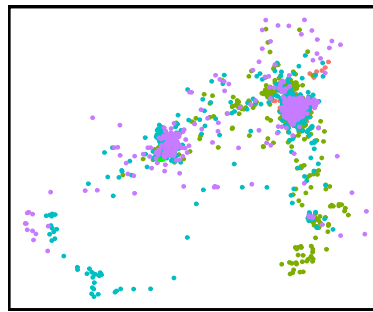

- 2019-10-23
- 2019-10-24
- 2019-10-25
- 2019-10-26

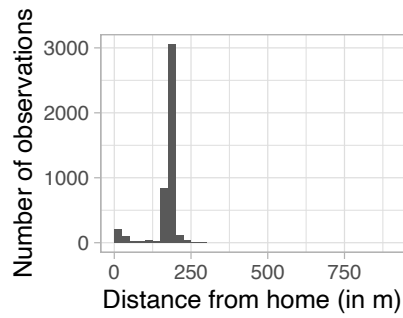

| Radius | Residence time | Proportion of total time | Number of visits |
|--------|----------------|--------------------------|------------------|
| 50m    | 5.1 h          | 93.3%                    | 20               |
| 100m   | 6 h            | 92.1%                    | 18               |
| 150m   | 7.1 h          | 90.6%                    | 17               |
| 200m   | 72.6 h         | 3.6%                     | 27               |
| 250m   | 75.1 h         | 0.2%                     | 3                |

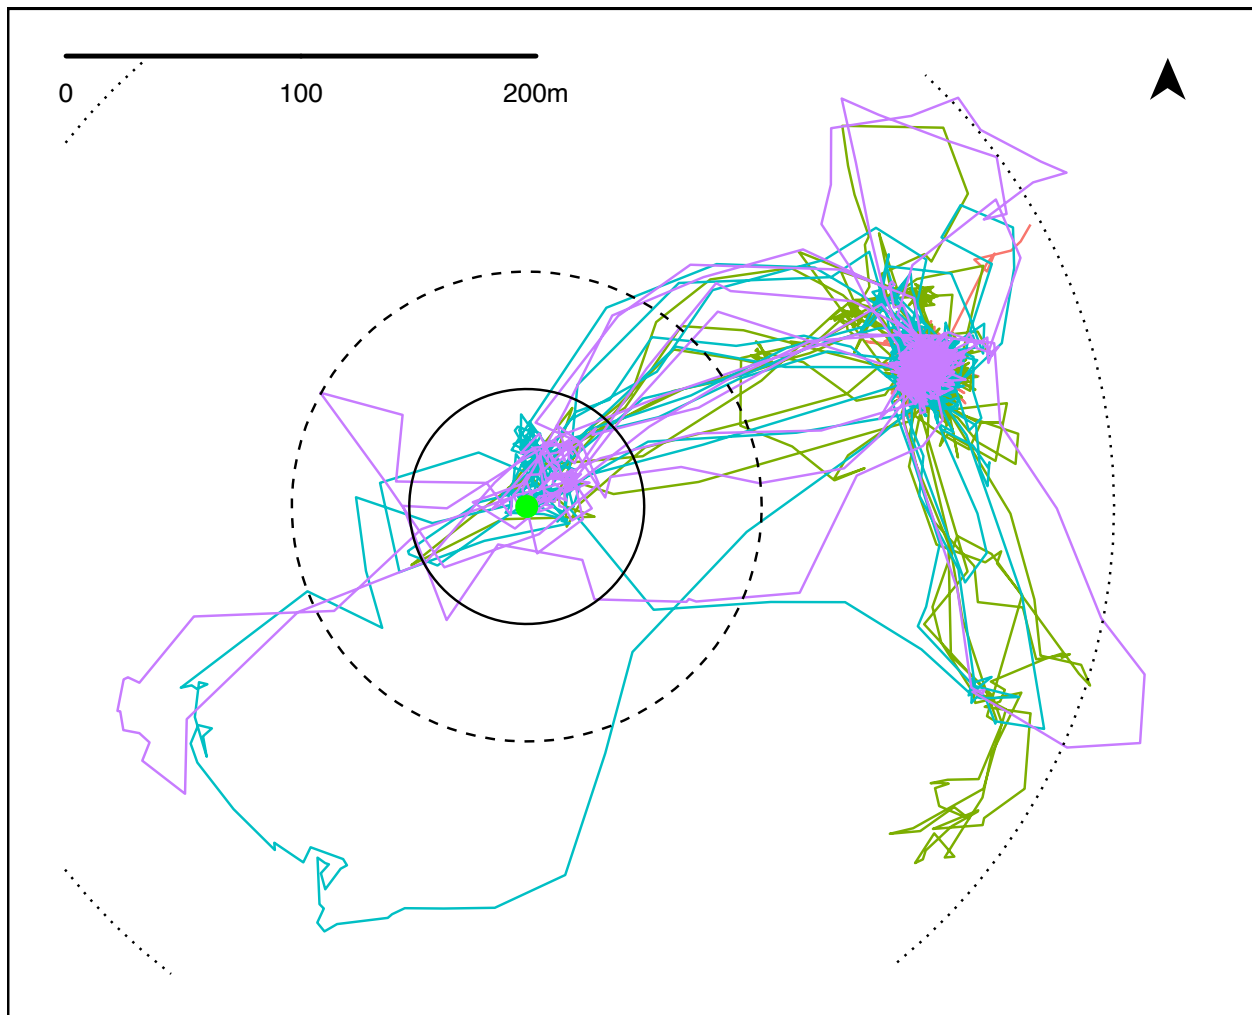

**Fig 7**

|              |                |
|--------------|----------------|
| Neighborhood | Neighborhood A |
| Season       | October        |
| Sex          | F              |
| Age (months) | 6              |

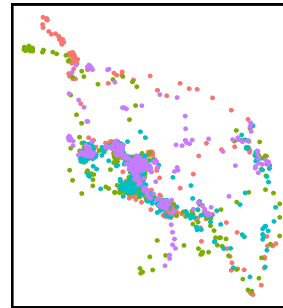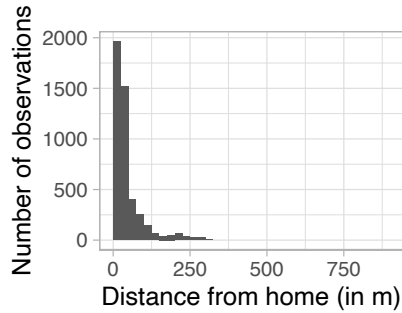

| Radius | Residence time | Proportion of total time | Number of visits |
|--------|----------------|--------------------------|------------------|
| 50m    | 57.2 h         | 24.4%                    | 40               |
| 100m   | 68.1 h         | 9.9%                     | 37               |
| 150m   | 71.5 h         | 5.5%                     | 13               |
| 200m   | 73.1 h         | 3.4%                     | 21               |
| 250m   | 74.8 h         | 1.2%                     | 6                |

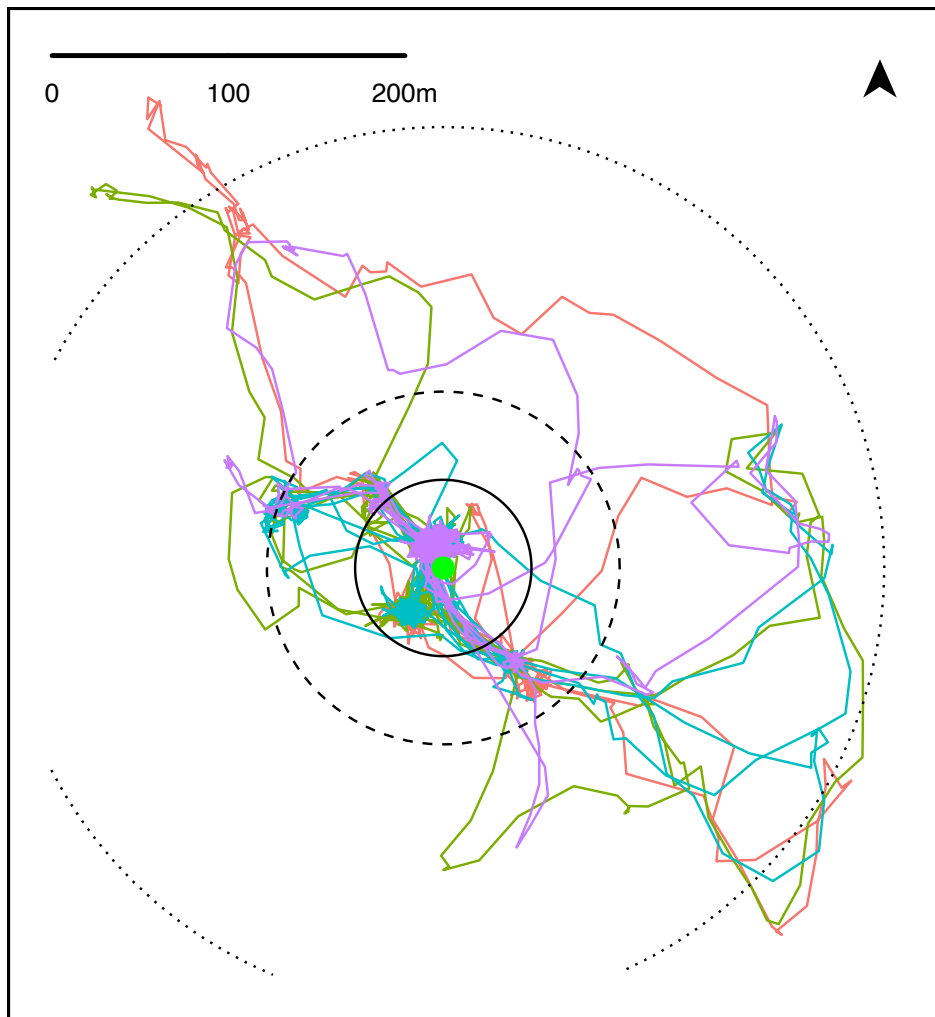



**Fig 8**

|              |                |
|--------------|----------------|
| Neighborhood | Neighborhood A |
| Season       | October        |
| Sex          | F              |
| Age (months) | 14             |

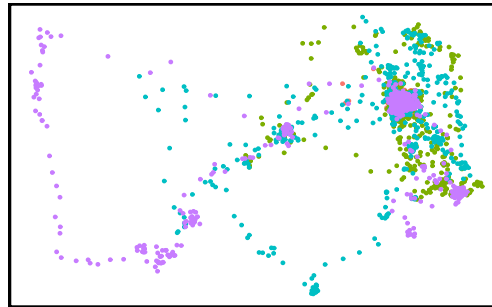

- 2019-10-23
- 2019-10-24
- 2019-10-25
- 2019-10-26

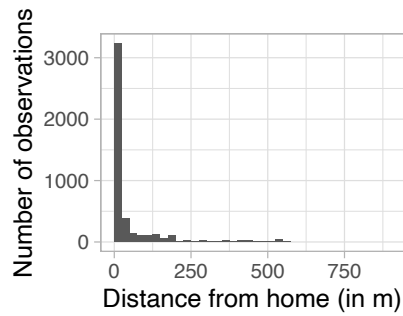

| Radius | Residence time | Proportion of total time | Number of visits |
|--------|----------------|--------------------------|------------------|
| 50m    | 62.9 h         | 18.4%                    | 32               |
| 100m   | 67.1 h         | 13%                      | 27               |
| 150m   | 71 h           | 7.9%                     | 19               |
| 200m   | 73.6 h         | 4.6%                     | 6                |
| 250m   | 74.1 h         | 3.9%                     | 4                |

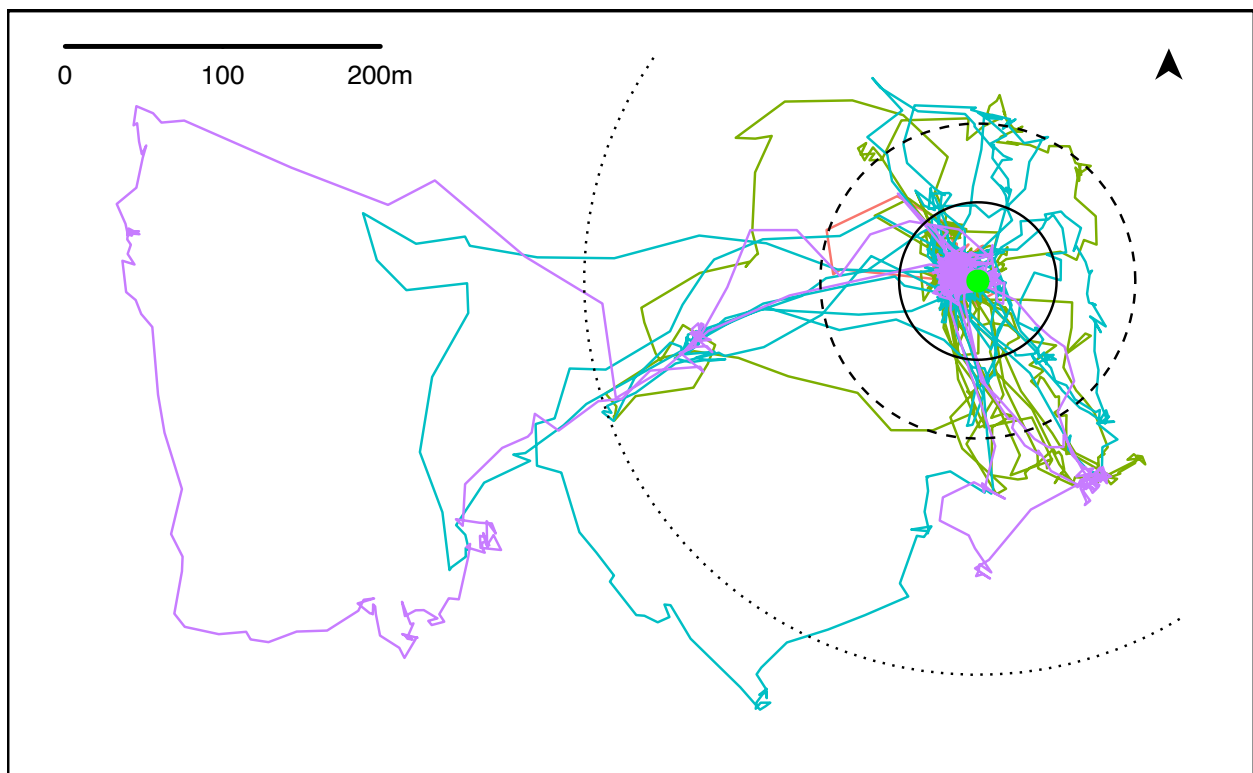

**Fig 9**

|              |                |
|--------------|----------------|
| Neighborhood | Neighborhood A |
| Season       | October        |
| Sex          | F              |
| Age (months) | 11             |

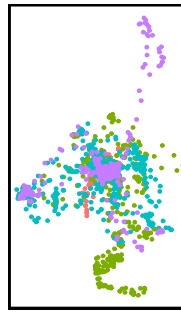

- 2019-10-23
- 2019-10-24
- 2019-10-25
- 2019-10-26

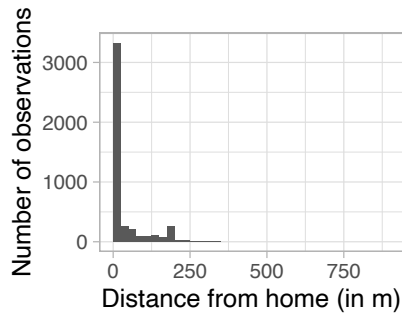

| Radius | Residence time | Proportion of total time | Number of visits |
|--------|----------------|--------------------------|------------------|
| 50m    | 61.3 h         | 19.7%                    | 38               |
| 100m   | 66.4 h         | 13.1%                    | 24               |
| 150m   | 69.7 h         | 8.8%                     | 18               |
| 200m   | 75.2 h         | 1.7%                     | 6                |
| 250m   | 75.8 h         | 0.7%                     | 3                |

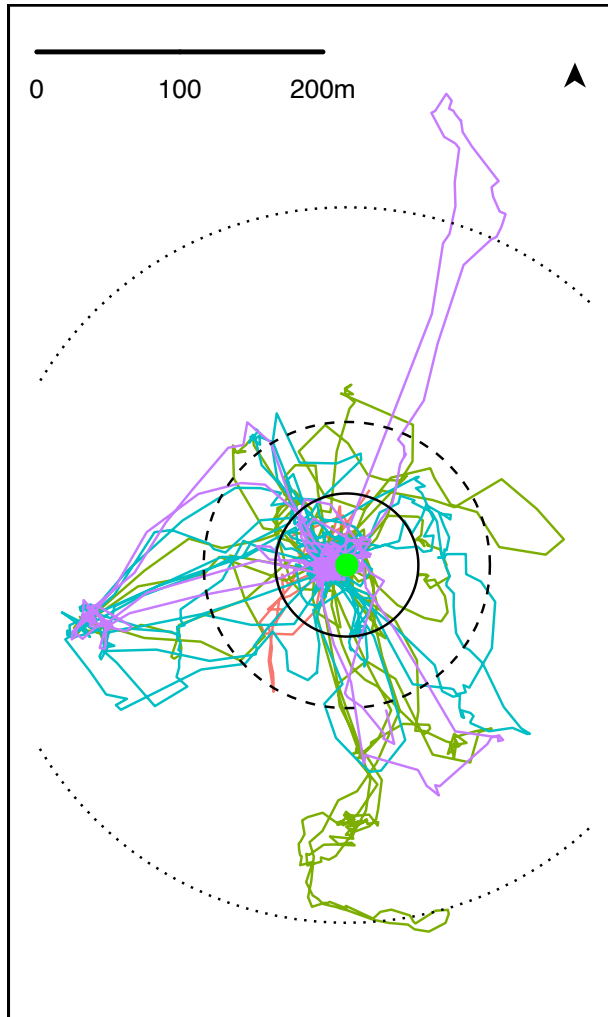

**Fig 10**

|              |                |
|--------------|----------------|
| Neighborhood | Neighborhood A |
| Season       | October        |
| Sex          | F              |
| Age (months) | 22             |

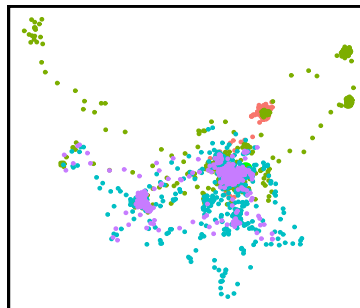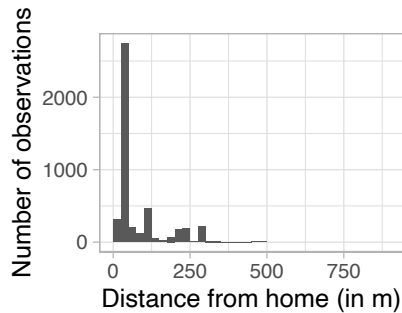

| Radius | Residence time | Proportion of total time | Number of visits |
|--------|----------------|--------------------------|------------------|
| 50m    | 49.8 h         | 33.7%                    | 62               |
| 100m   | 54.8 h         | 27%                      | 29               |
| 150m   | 63.1 h         | 16%                      | 13               |
| 200m   | 64.8 h         | 13.8%                    | 37               |
| 250m   | 70.5 h         | 6.1%                     | 6                |

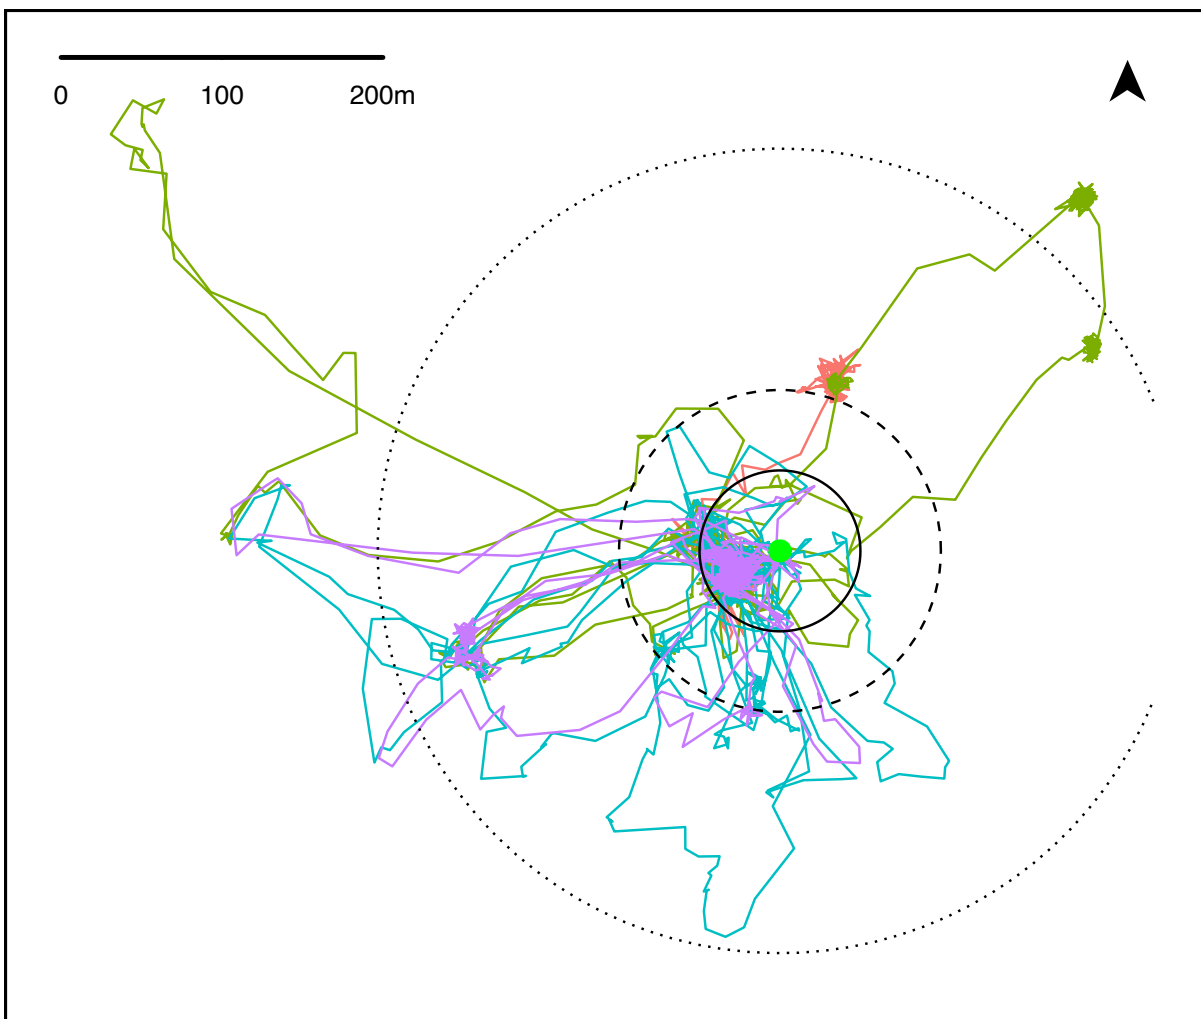

**Fig 11**

|              |                |
|--------------|----------------|
| Neighborhood | Neighborhood A |
| Season       | October        |
| Sex          | F              |
| Age (months) | 5              |

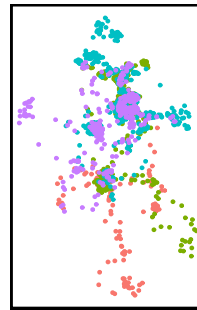

- 2019-10-23
- 2019-10-24
- 2019-10-25
- 2019-10-26

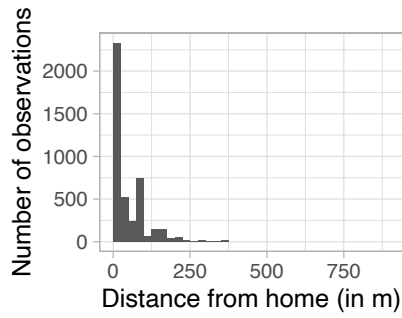

| Radius | Residence time | Proportion of total time | Number of visits |
|--------|----------------|--------------------------|------------------|
| 50m    | 46.9 h         | 35%                      | 35               |
| 100m   | 63.7 h         | 11.8%                    | 22               |
| 150m   | 67.1 h         | 7.1%                     | 20               |
| 200m   | 70.2 h         | 2.8%                     | 7                |
| 250m   | 71.3 h         | 1.2%                     | 3                |

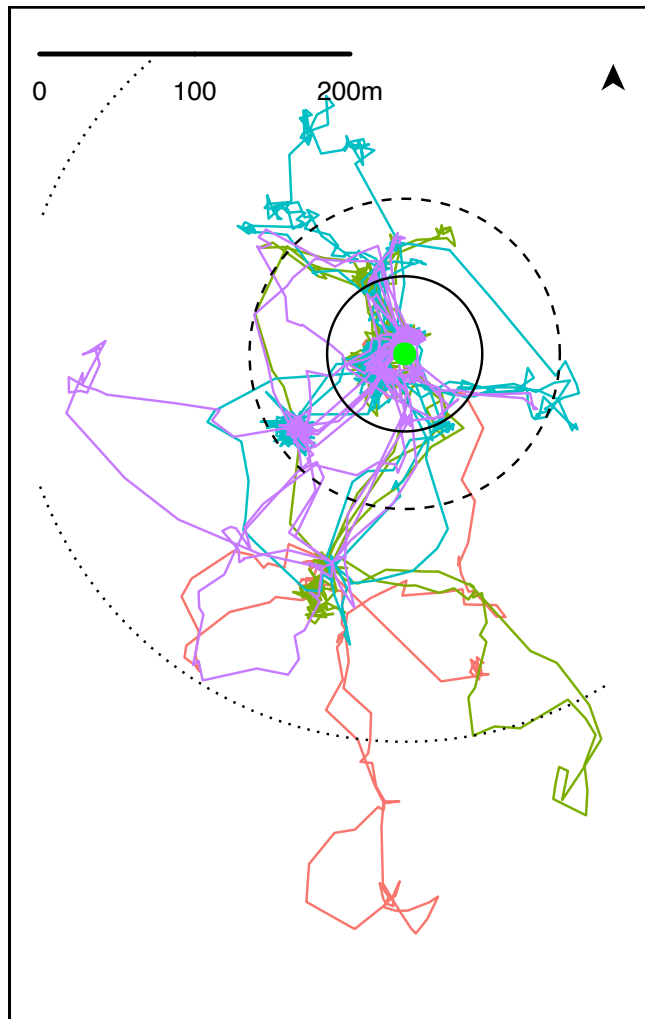

**Fig 12**

|              |                |
|--------------|----------------|
| Neighborhood | Neighborhood B |
| Season       | October        |
| Sex          | F              |
| Age (months) | 8              |

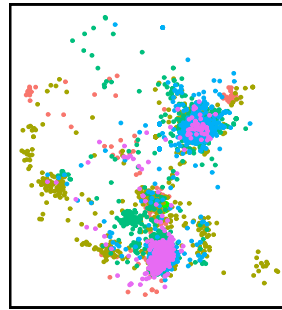

- 2019-10-27
- 2019-10-28
- 2019-10-29
- 2019-10-30
- 2019-10-31

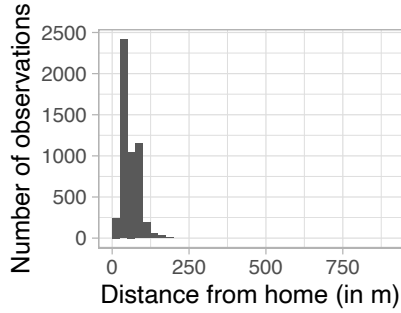

| Radius | Residence time | Proportion of total time | Number of visits |
|--------|----------------|--------------------------|------------------|
| 50m    | 44.6 h         | 50.4%                    | 237              |
| 100m   | 84.8 h         | 5.7%                     | 57               |
| 150m   | 89.3 h         | 0.7%                     | 6                |
| 200m   | 89.9 h         | 0%                       | 0                |
| 250m   | 89.9 h         | 0%                       | 0                |

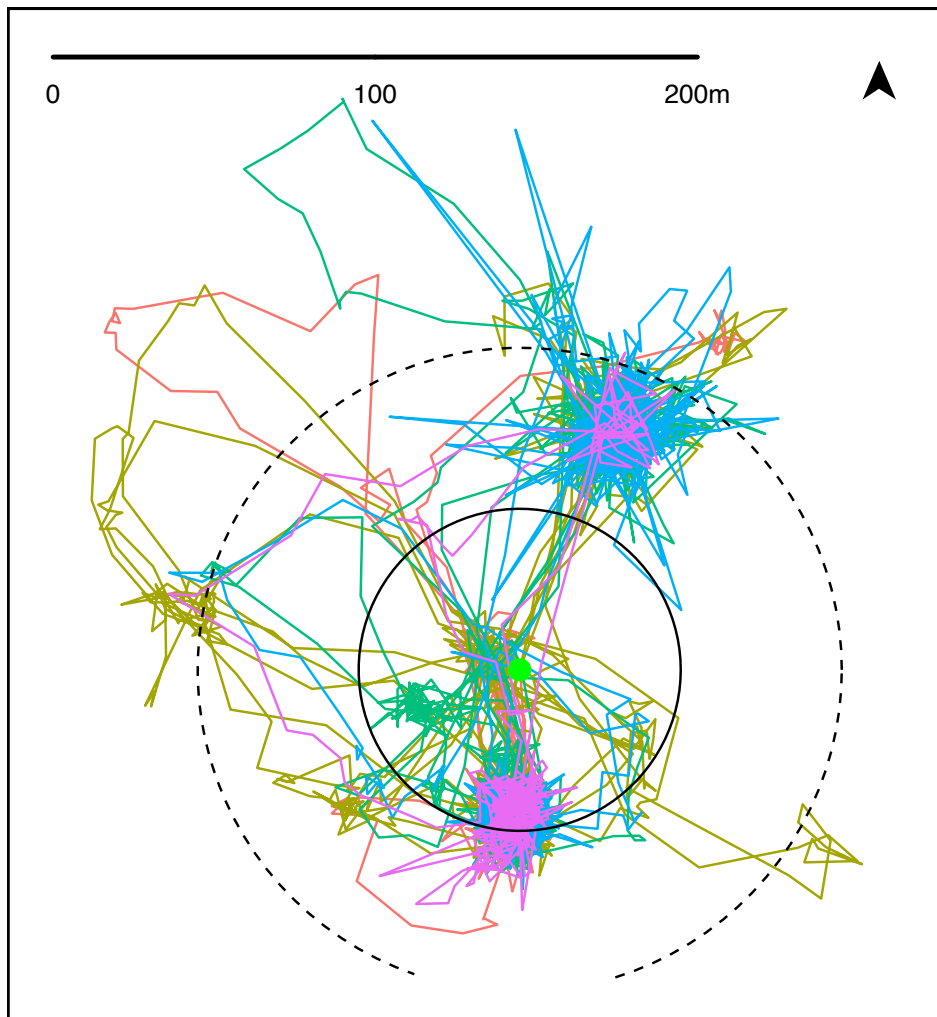

**Fig 13**

|              |                |
|--------------|----------------|
| Neighborhood | Neighborhood B |
| Season       | October        |
| Sex          | M              |
| Age (months) | 12             |

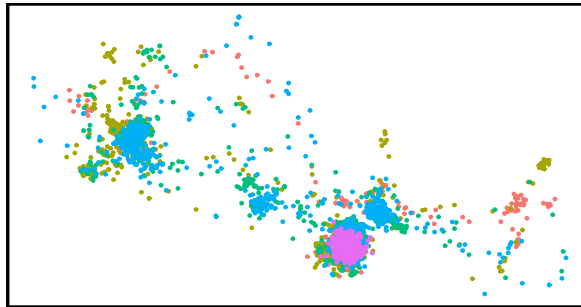

- 2019-10-27
- 2019-10-28
- 2019-10-29
- 2019-10-30
- 2019-10-31

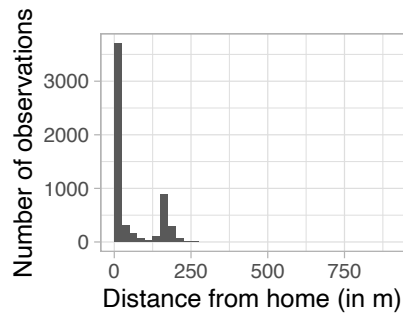

| Radius | Residence time | Proportion of total time | Number of visits |
|--------|----------------|--------------------------|------------------|
| 50m    | 67.5 h         | 28.7%                    | 30               |
| 100m   | 71 h           | 24.9%                    | 13               |
| 150m   | 73.2 h         | 22.6%                    | 23               |
| 200m   | 93.5 h         | 1.1%                     | 8                |
| 250m   | 94.6 h         | 0%                       | 1                |

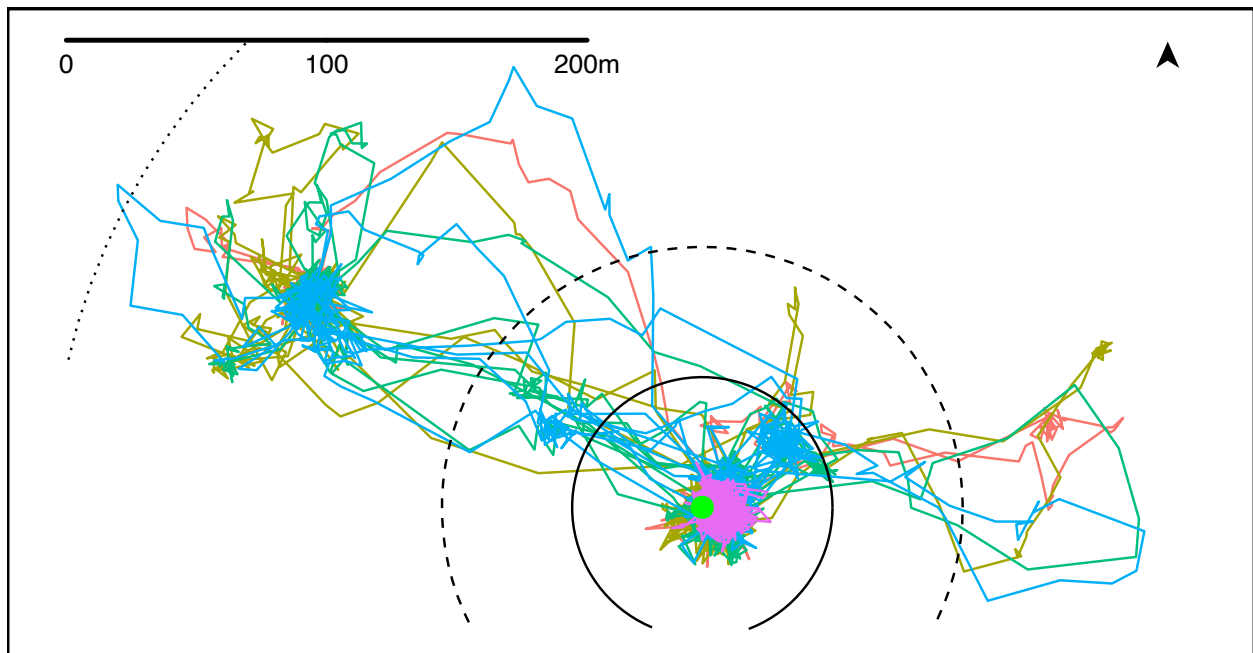

**Fig 14**

|              |                |
|--------------|----------------|
| Neighborhood | Neighborhood B |
| Season       | October        |
| Sex          | F              |
| Age (months) | 6              |

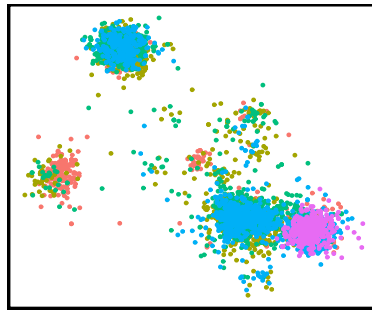

- 2019-10-27
- 2019-10-28
- 2019-10-29
- 2019-10-30
- 2019-10-31

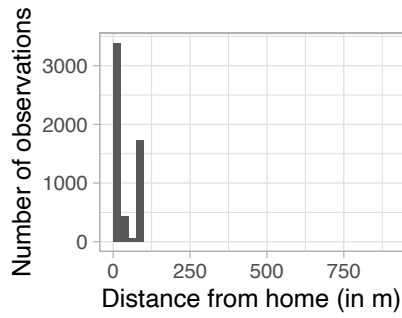

| Radius | Residence time | Proportion of total time | Number of visits |
|--------|----------------|--------------------------|------------------|
| 50m    | 64.8 h         | 31.2%                    | 10               |
| 100m   | 94.2 h         | 0%                       | 0                |
| 150m   | 94.2 h         | 0%                       | 0                |
| 200m   | 94.2 h         | 0%                       | 0                |
| 250m   | 94.2 h         | 0%                       | 0                |

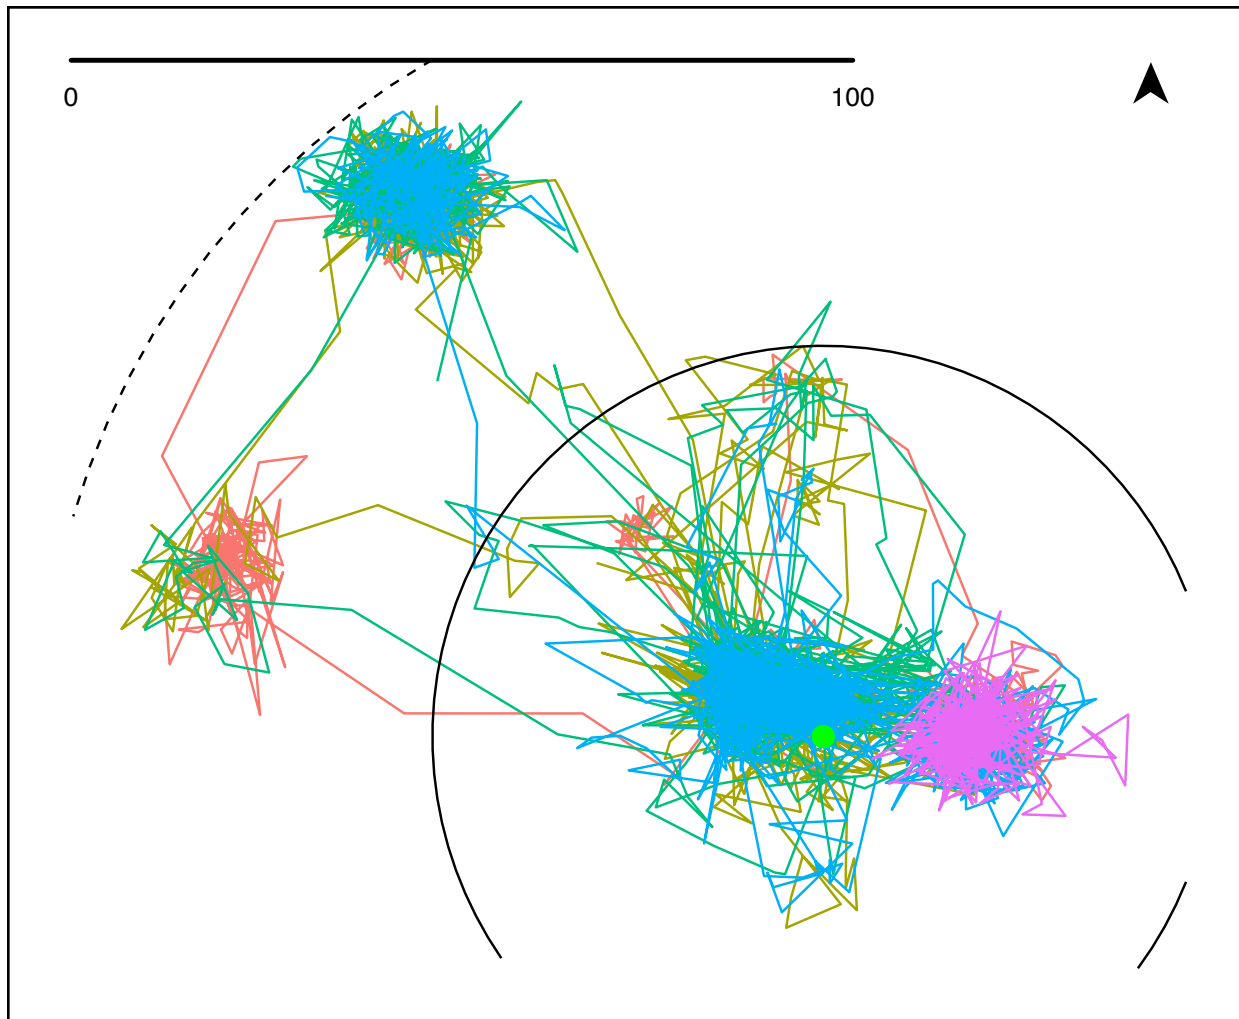

**Fig 15**

|              |                |
|--------------|----------------|
| Neighborhood | Neighborhood B |
| Season       | October        |
| Sex          | F              |
| Age (months) | 6              |

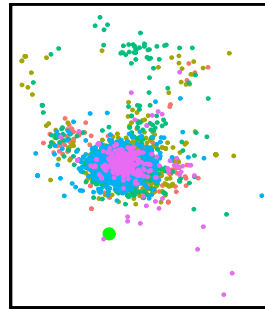

- 2019-10-26
- 2019-10-27
- 2019-10-28
- 2019-10-29
- 2019-10-30

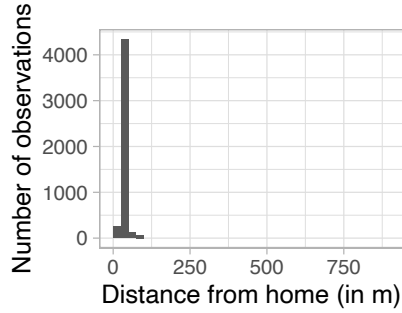

| Radius | Residence time | Proportion of total time | Number of visits |
|--------|----------------|--------------------------|------------------|
| 50m    | 87.4 h         | 4%                       | 55               |
| 100m   | 91.1 h         | 0%                       | 0                |
| 150m   | 91.1 h         | 0%                       | 0                |
| 200m   | 91.1 h         | 0%                       | 0                |
| 250m   | 91.1 h         | 0%                       | 0                |

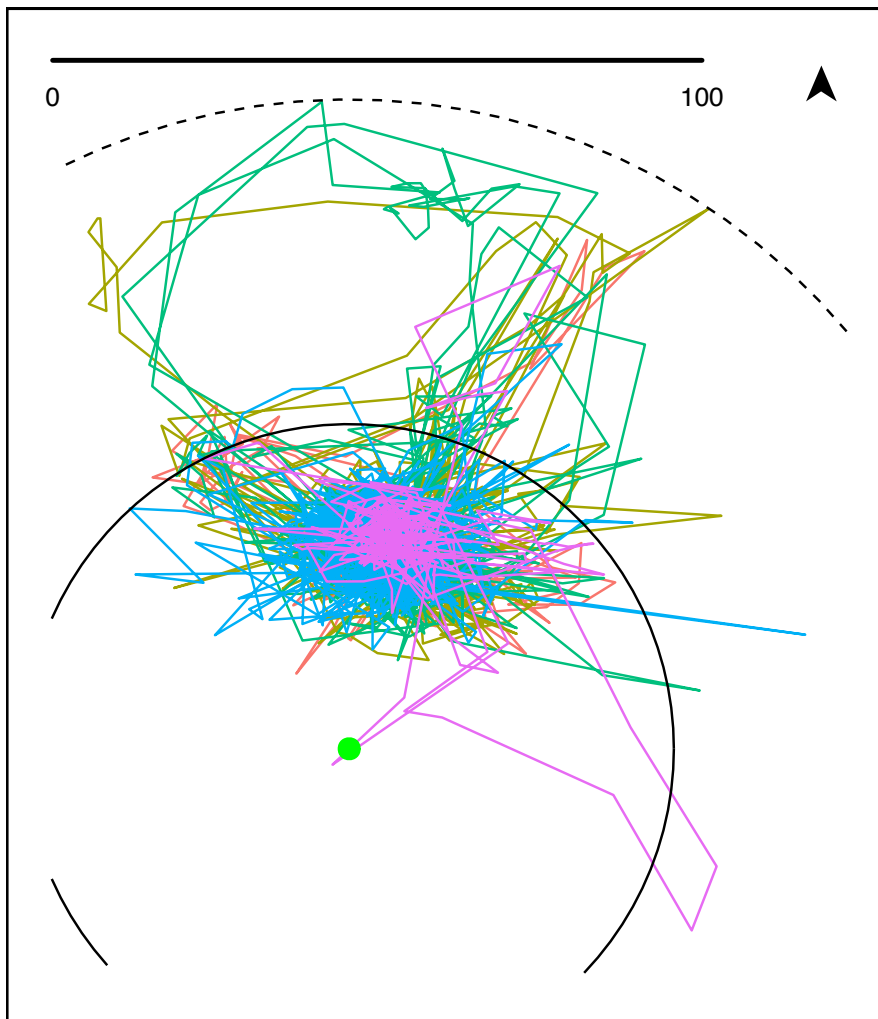



**Fig 16**

|              |                |
|--------------|----------------|
| Neighborhood | Neighborhood B |
| Season       | October        |
| Sex          | F              |
| Age (months) | 55             |

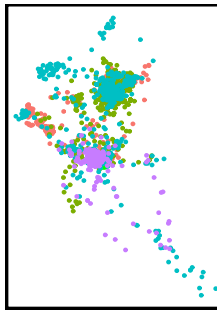

- 2019-10-28
- 2019-10-29
- 2019-10-30
- 2019-10-31

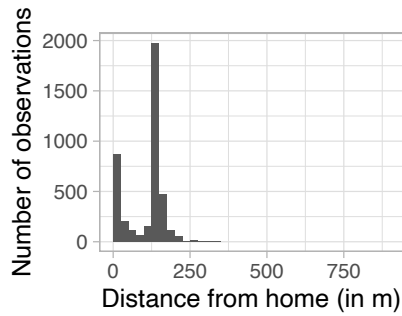

| Radius | Residence time | Proportion of total time | Number of visits |
|--------|----------------|--------------------------|------------------|
| 50m    | 18 h           | 73.7%                    | 26               |
| 100m   | 20.9 h         | 69.5%                    | 19               |
| 150m   | 57.2 h         | 16.5%                    | 60               |
| 200m   | 67.2 h         | 1.9%                     | 10               |
| 250m   | 68.1 h         | 0.5%                     | 3                |

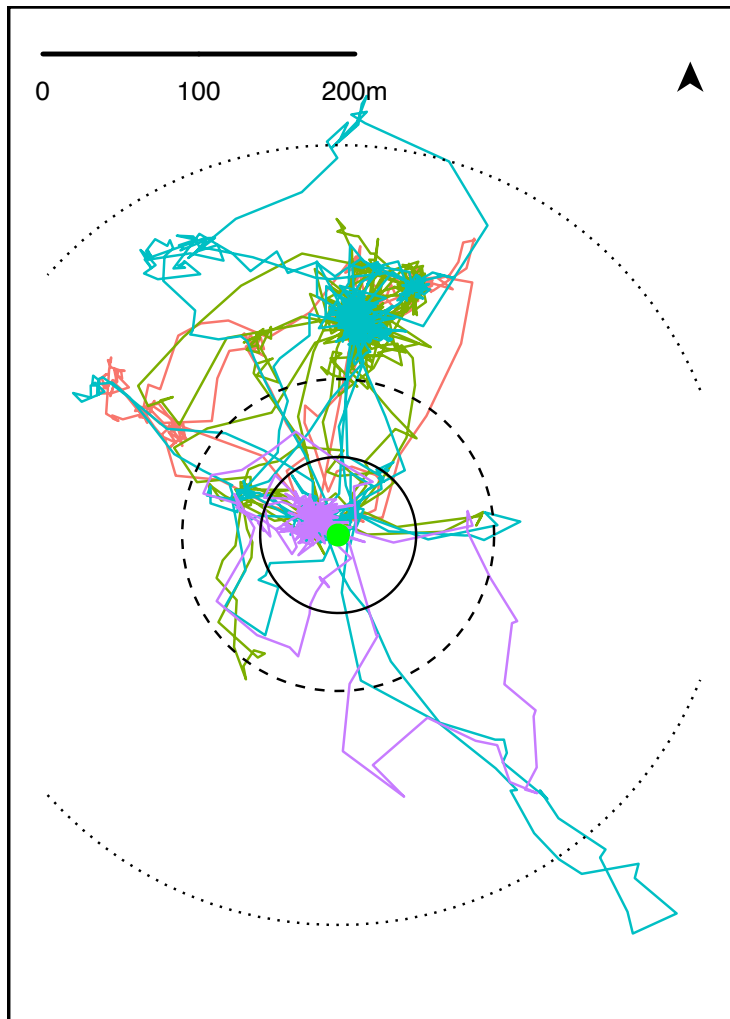

**Fig 17**

|              |                |
|--------------|----------------|
| Neighborhood | Neighborhood B |
| Season       | October        |
| Sex          | F              |
| Age (months) | 16             |

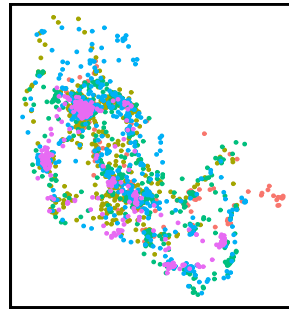

- 2019-10-27
- 2019-10-28
- 2019-10-29
- 2019-10-30
- 2019-10-31

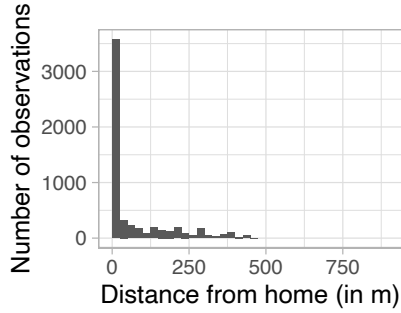

| Radius | Residence time | Proportion of total time | Number of visits |
|--------|----------------|--------------------------|------------------|
| 50m    | 65.6 h         | 31.2%                    | 54               |
| 100m   | 72.2 h         | 24.2%                    | 34               |
| 150m   | 77 h           | 19.2%                    | 43               |
| 200m   | 81.5 h         | 14.4%                    | 42               |
| 250m   | 86.2 h         | 9.5%                     | 15               |

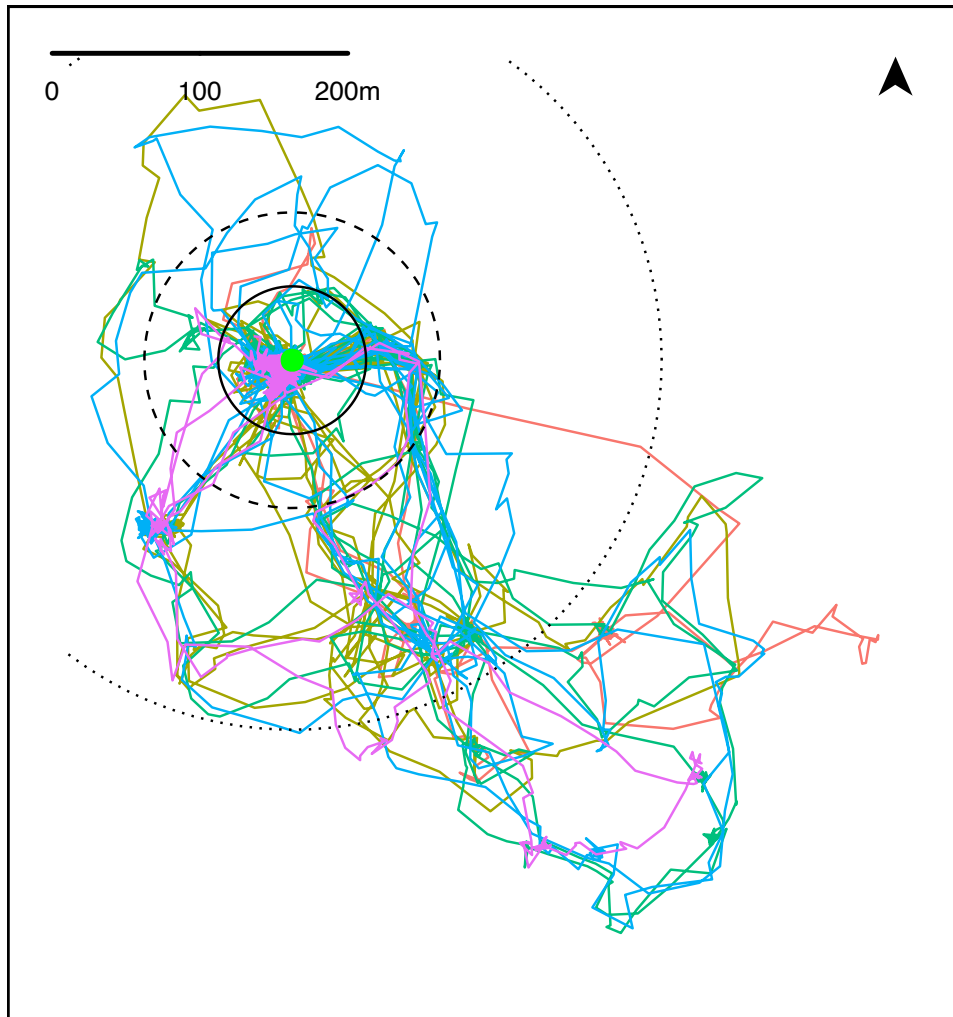

**Fig 18**

|              |                |
|--------------|----------------|
| Neighborhood | Neighborhood B |
| Season       | October        |
| Sex          | F              |
| Age (months) | 5              |

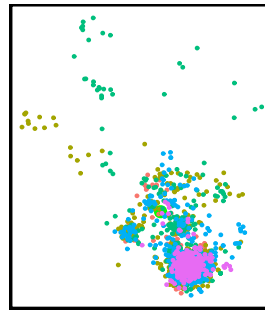

- 2019-10-26
- 2019-10-27
- 2019-10-28
- 2019-10-29
- 2019-10-30

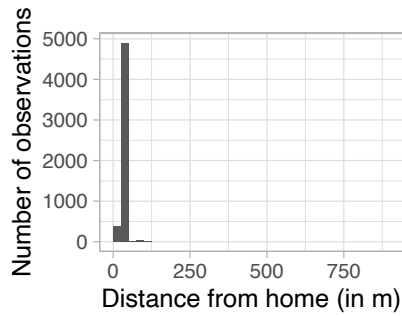

| Radius | Residence time | Proportion of total time | Number of visits |
|--------|----------------|--------------------------|------------------|
| 50m    | 89.5 h         | 0.9%                     | 5                |
| 100m   | 90.2 h         | 0.2%                     | 1                |
| 150m   | 90.3 h         | 0%                       | 0                |
| 200m   | 90.3 h         | 0%                       | 0                |
| 250m   | 90.3 h         | 0%                       | 0                |

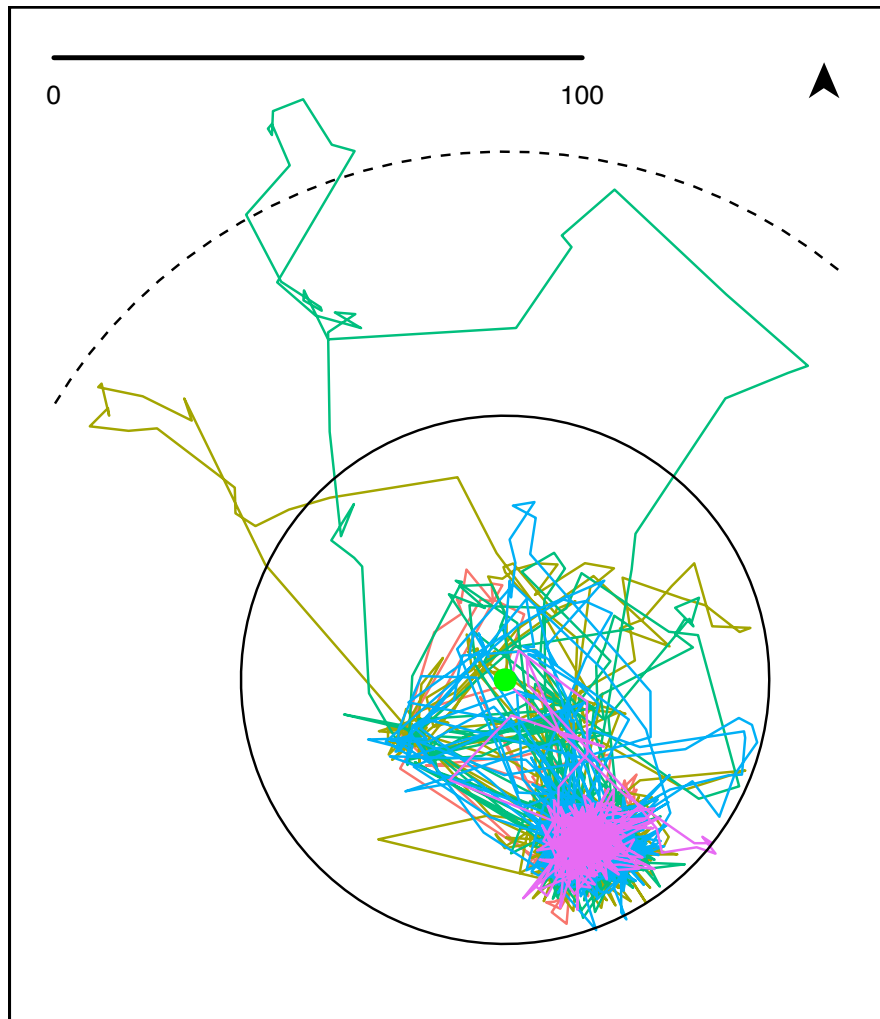

**Fig 19**

|              |                |
|--------------|----------------|
| Neighborhood | Neighborhood B |
| Season       | October        |
| Sex          | M              |
| Age (months) | 5              |

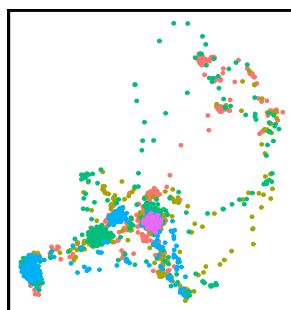

- 2019-10-27
- 2019-10-28
- 2019-10-29
- 2019-10-30
- 2019-10-31

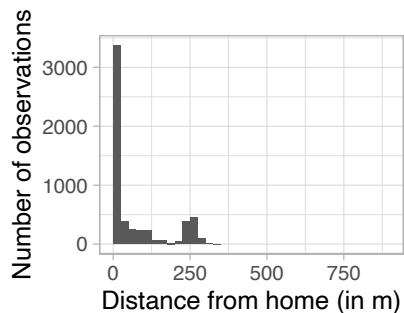

| Radius | Residence time | Proportion of total time | Number of visits |
|--------|----------------|--------------------------|------------------|
| 50m    | 63.7 h         | 33%                      | 24               |
| 100m   | 71.6 h         | 24.5%                    | 39               |
| 150m   | 76.7 h         | 19.2%                    | 20               |
| 200m   | 78 h           | 17.8%                    | 13               |
| 250m   | 85.4 h         | 10.1%                    | 107              |

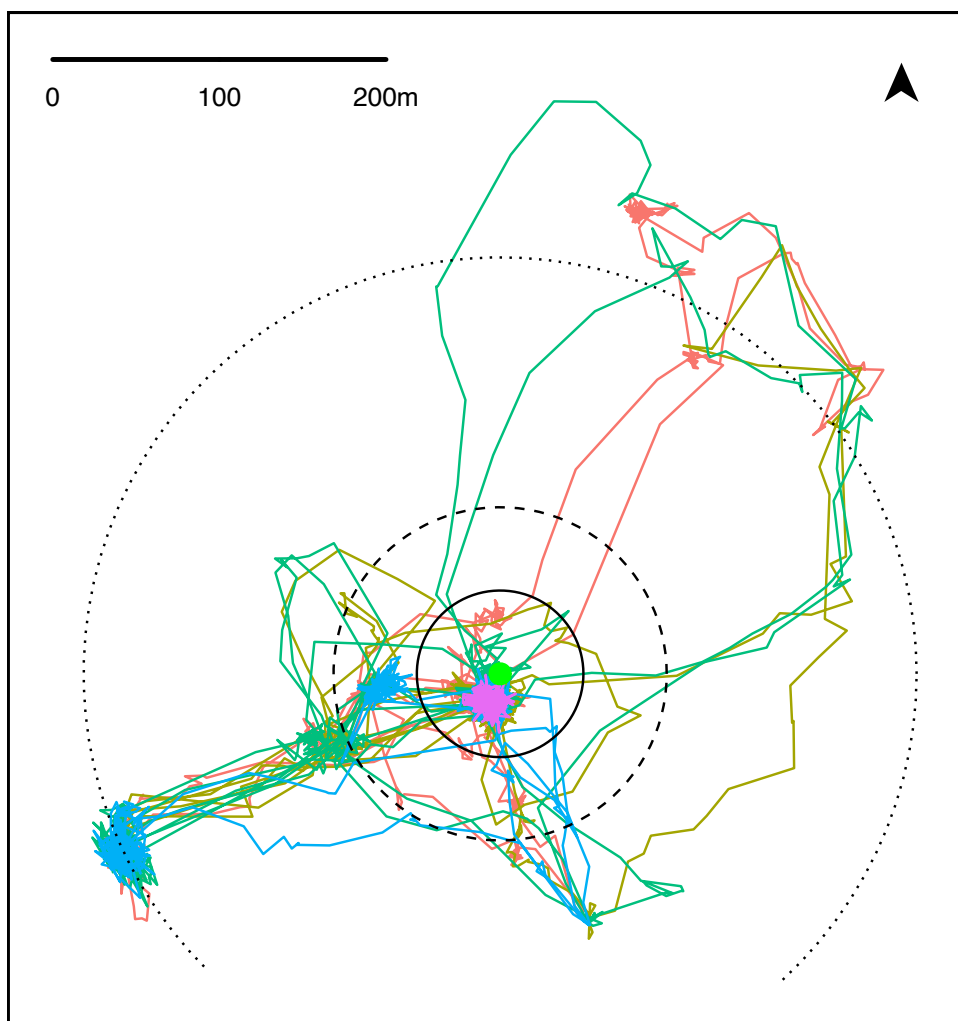

**Fig 20**

|              |                |
|--------------|----------------|
| Neighborhood | Neighborhood B |
| Season       | October        |
| Sex          | F              |
| Age (months) | 71             |

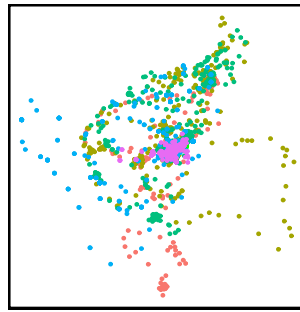

- 2019-10-27
- 2019-10-28
- 2019-10-29
- 2019-10-30
- 2019-10-31

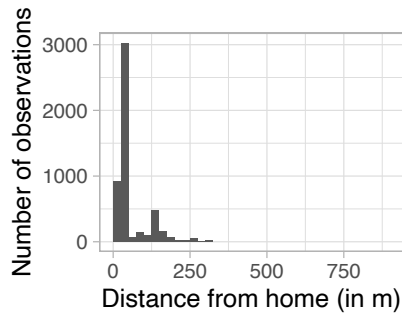

| Radius | Residence time | Proportion of total time | Number of visits |
|--------|----------------|--------------------------|------------------|
| 50m    | 74.1 h         | 20.8%                    | 27               |
| 100m   | 77.7 h         | 16.9%                    | 24               |
| 150m   | 87.7 h         | 6.2%                     | 25               |
| 200m   | 91.4 h         | 2.2%                     | 10               |
| 250m   | 92.4 h         | 1.2%                     | 5                |

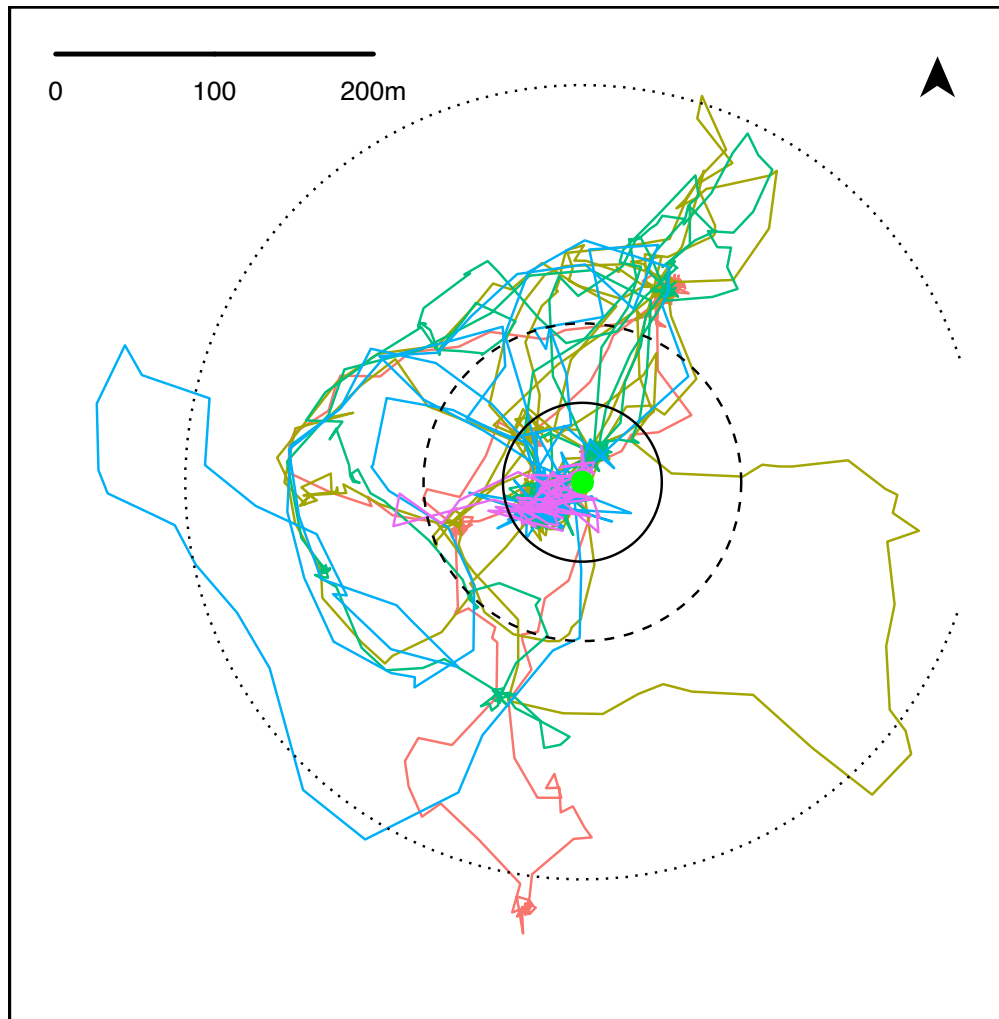

**Fig 21**

|              |                |
|--------------|----------------|
| Neighborhood | Neighborhood B |
| Season       | October        |
| Sex          | F              |
| Age (months) | 45             |

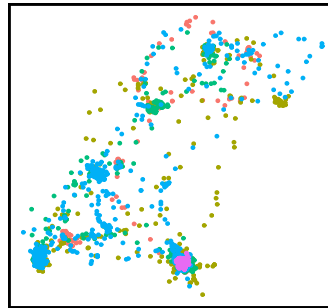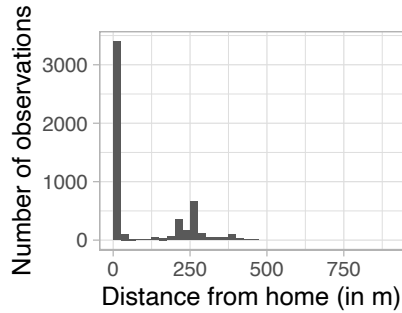

| Radius | Residence time | Proportion of total time | Number of visits |
|--------|----------------|--------------------------|------------------|
| 50m    | 61.5 h         | 33.7%                    | 11               |
| 100m   | 62.7 h         | 32.5%                    | 6                |
| 150m   | 63.7 h         | 31.4%                    | 12               |
| 200m   | 65.3 h         | 29.6%                    | 24               |
| 250m   | 75 h           | 19.2%                    | 44               |

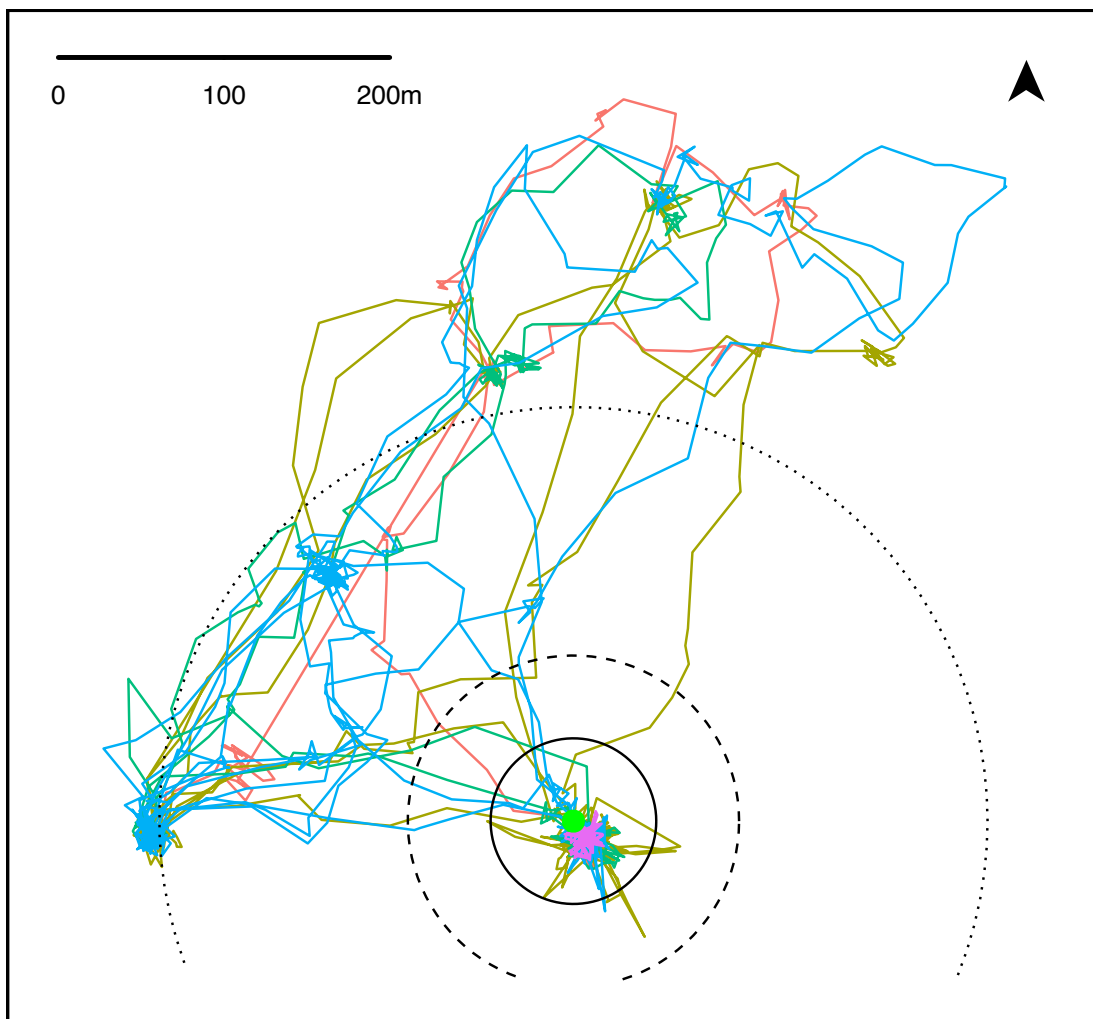

**Fig 22**

|              |                |
|--------------|----------------|
| Neighborhood | Neighborhood B |
| Season       | October        |
| Sex          | F              |
| Age (months) | 4              |

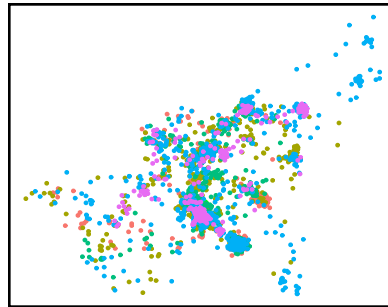

- 2019-10-27
- 2019-10-28
- 2019-10-29
- 2019-10-30
- 2019-10-31

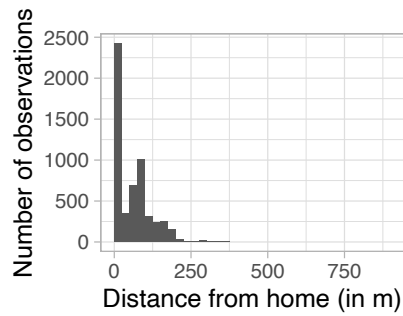

| Radius | Residence time | Proportion of total time | Number of visits |
|--------|----------------|--------------------------|------------------|
| 50m    | 47.2 h         | 49.2%                    | 51               |
| 100m   | 75.8 h         | 18.5%                    | 54               |
| 150m   | 85.2 h         | 8.4%                     | 86               |
| 200m   | 91.9 h         | 1.2%                     | 13               |
| 250m   | 92.4 h         | 0.7%                     | 3                |

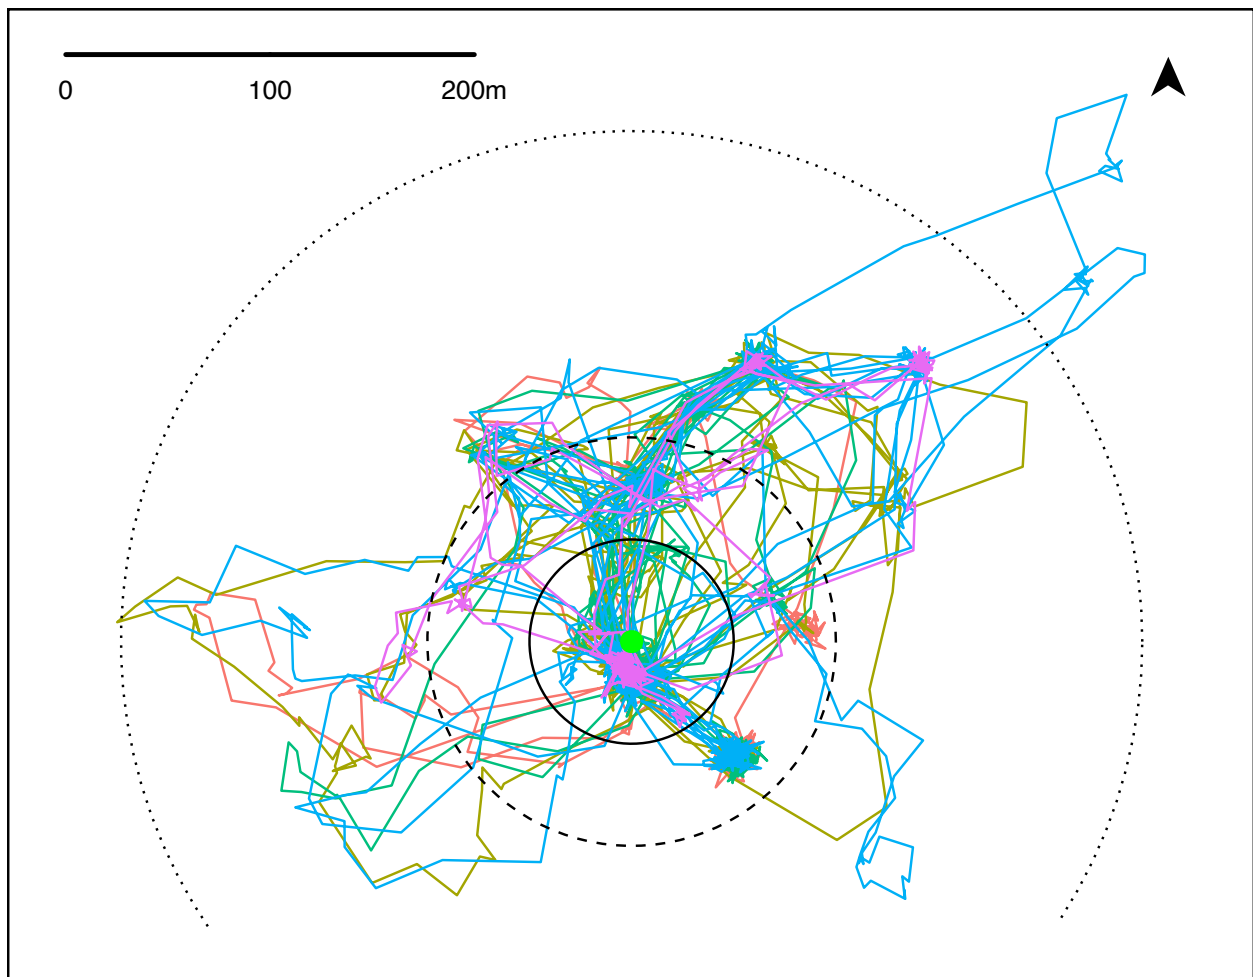

**Fig 23**

|              |                |
|--------------|----------------|
| Neighborhood | Neighborhood B |
| Season       | October        |
| Sex          | M              |
| Age (months) | 13             |

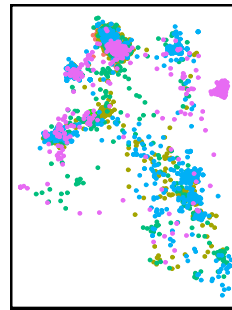

- 2019-10-27
- 2019-10-28
- 2019-10-29
- 2019-10-30
- 2019-10-31

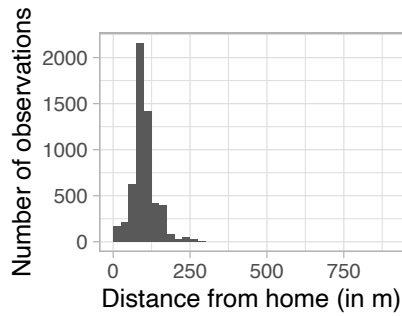

| Radius | Residence time | Proportion of total time | Number of visits |
|--------|----------------|--------------------------|------------------|
| 50m    | 6.3 h          | 93.3%                    | 43               |
| 100m   | 53.6 h         | 43.1%                    | 222              |
| 150m   | 84.5 h         | 10.3%                    | 48               |
| 200m   | 92.6 h         | 1.7%                     | 11               |
| 250m   | 93.8 h         | 0.5%                     | 6                |

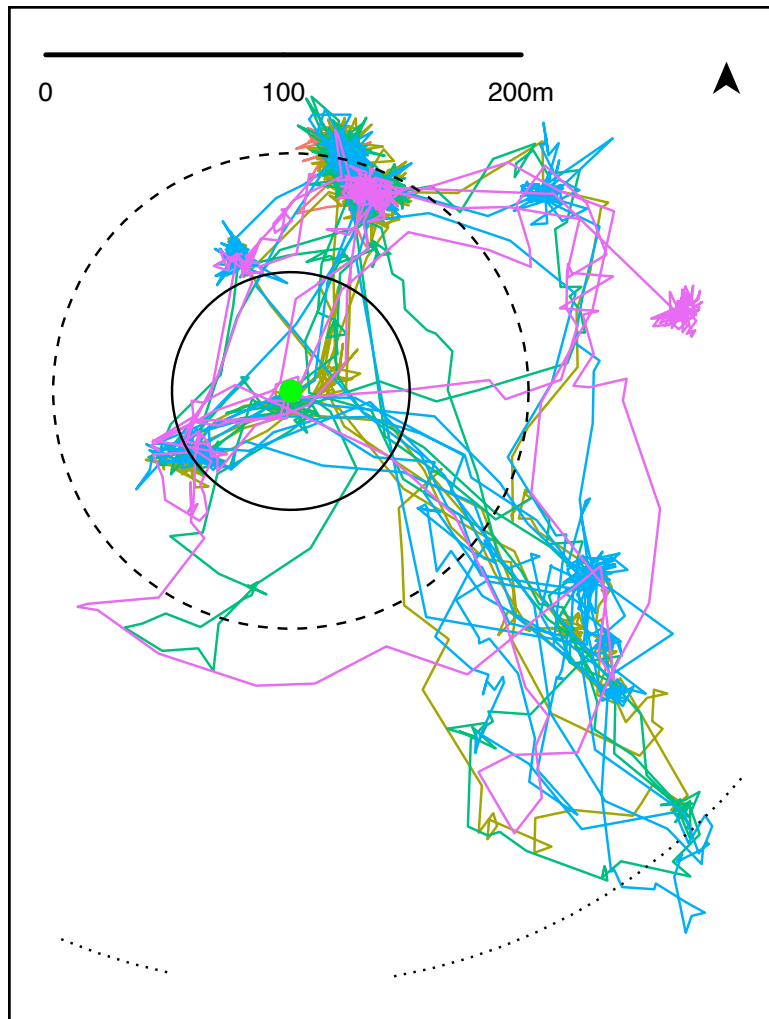



**Fig 24**

|              |                |
|--------------|----------------|
| Neighborhood | Neighborhood A |
| Season       | April          |
| Sex          | M              |
| Age (months) | NA             |

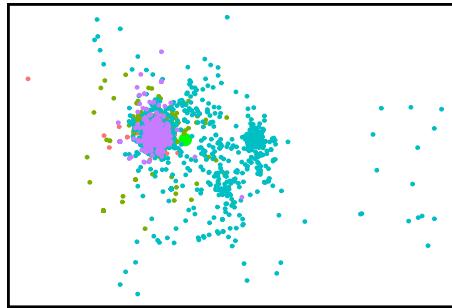

- 2019-04-06
- 2019-04-07
- 2019-04-08
- 2019-04-09

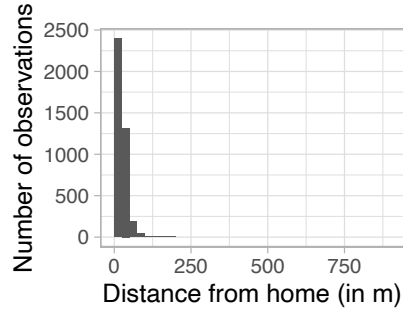

| Radius | Residence time | Proportion of total time | Number of visits |
|--------|----------------|--------------------------|------------------|
| 50m    | 69.6 h         | 7.2%                     | 47               |
| 100m   | 74.6 h         | 0.5%                     | 5                |
| 150m   | 74.8 h         | 0.2%                     | 1                |
| 200m   | 75 h           | 0%                       | 0                |
| 250m   | 75 h           | 0%                       | 0                |

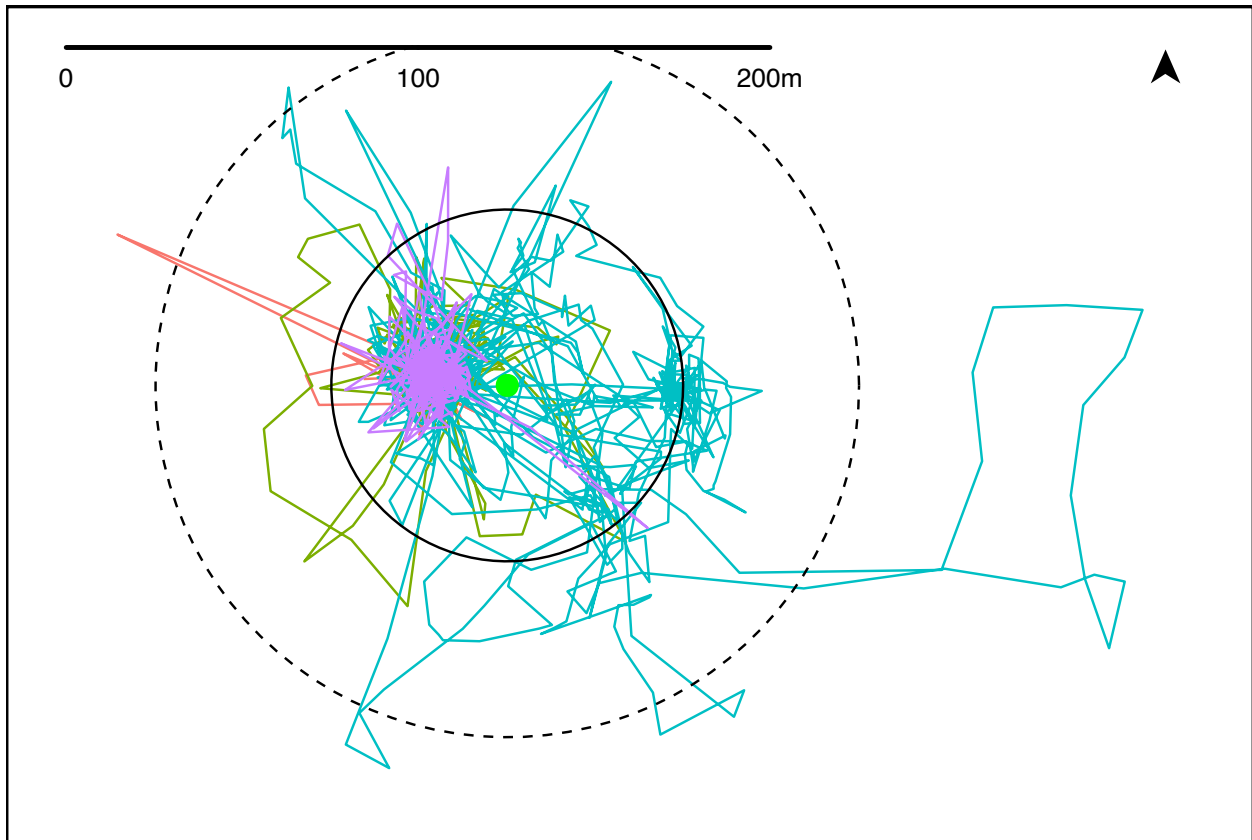

**Fig 25**

|              |                |
|--------------|----------------|
| Neighborhood | Neighborhood A |
| Season       | April          |
| Sex          | F              |
| Age (months) | 4              |

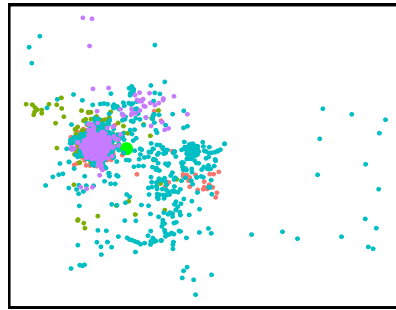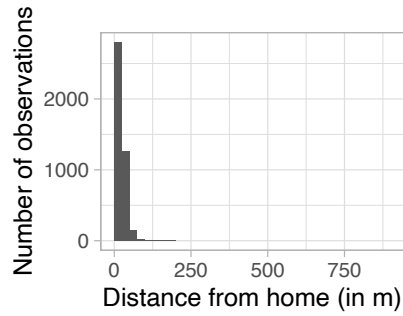

| Radius | Residence time | Proportion of total time | Number of visits |
|--------|----------------|--------------------------|------------------|
| 50m    | 70.8 h         | 4.2%                     | 32               |
| 100m   | 73.6 h         | 0.4%                     | 2                |
| 150m   | 73.7 h         | 0.2%                     | 1                |
| 200m   | 73.9 h         | 0%                       | 0                |
| 250m   | 73.9 h         | 0%                       | 0                |

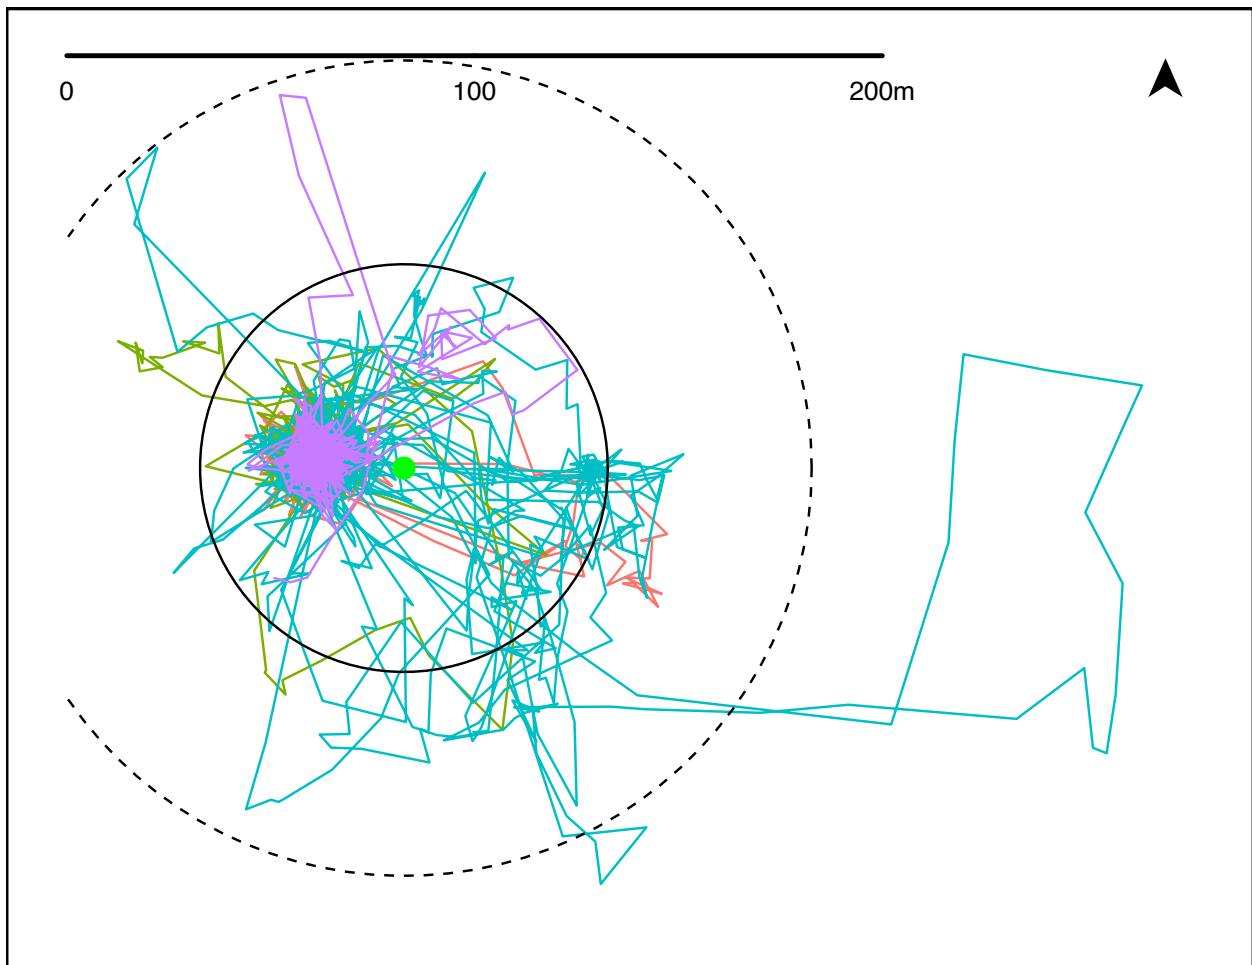

**Fig 26**

|              |                |
|--------------|----------------|
| Neighborhood | Neighborhood A |
| Season       | April          |
| Sex          | F              |
| Age (months) | NA             |

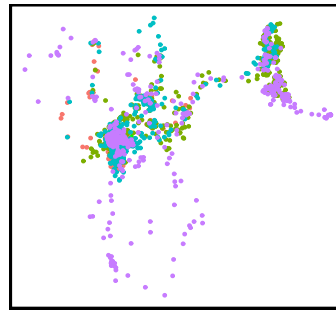

- 2019-04-05
- 2019-04-06
- 2019-04-07
- 2019-04-08

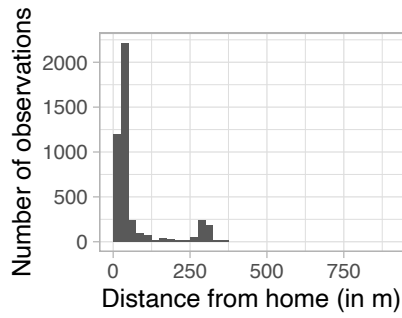

| Radius | Residence time | Proportion of total time | Number of visits |
|--------|----------------|--------------------------|------------------|
| 50m    | 58.2 h         | 23%                      | 77               |
| 100m   | 63.8 h         | 15.5%                    | 23               |
| 150m   | 65.3 h         | 13.6%                    | 11               |
| 200m   | 66.4 h         | 12.1%                    | 9                |
| 250m   | 67 h           | 11.3%                    | 5                |

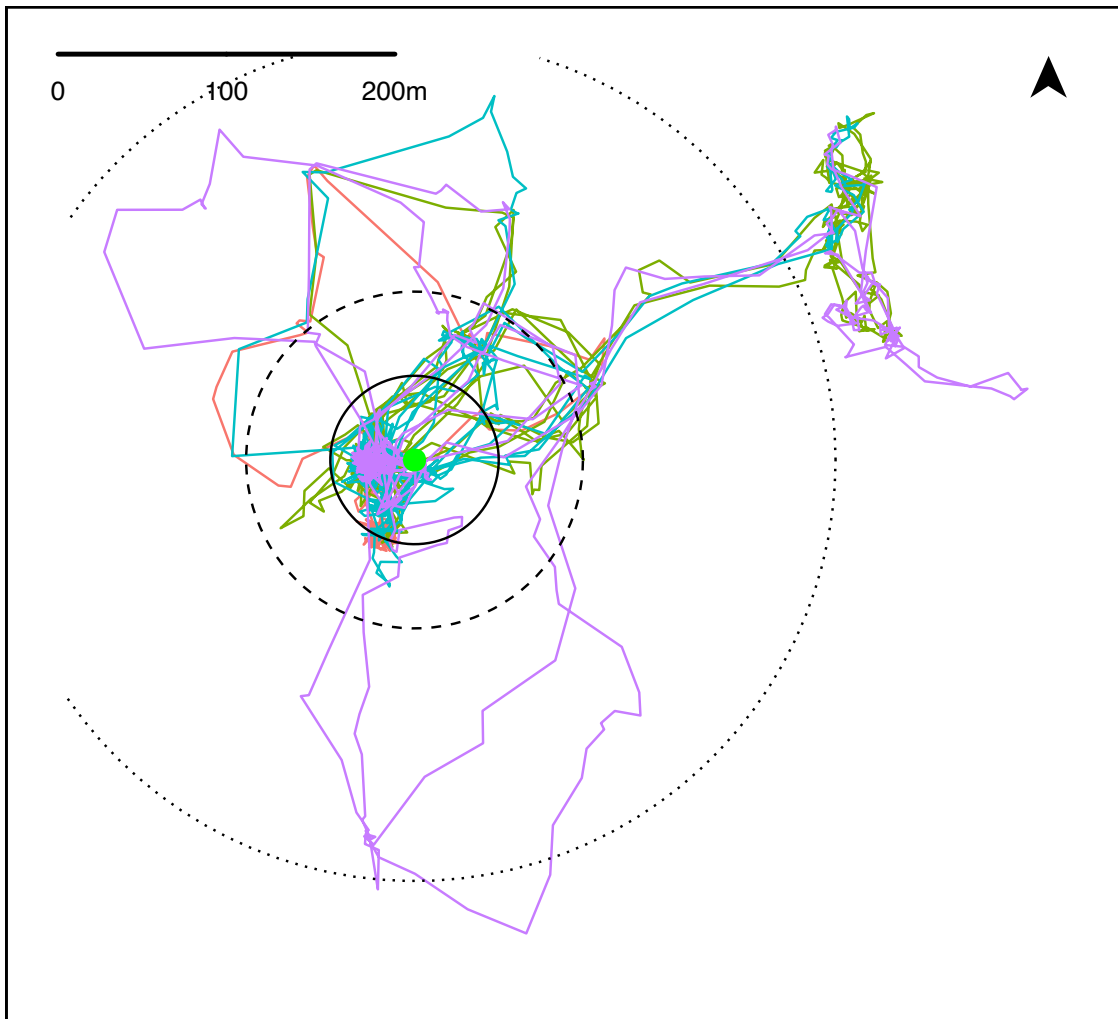

**Pig 27**

|              |                |
|--------------|----------------|
| Neighborhood | Neighborhood A |
| Season       | April          |
| Sex          | F              |
| Age (months) | 10             |

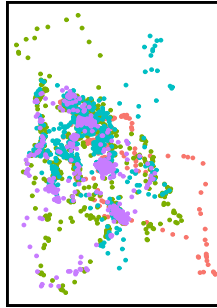

- 2019-04-05
- 2019-04-06
- 2019-04-07
- 2019-04-08

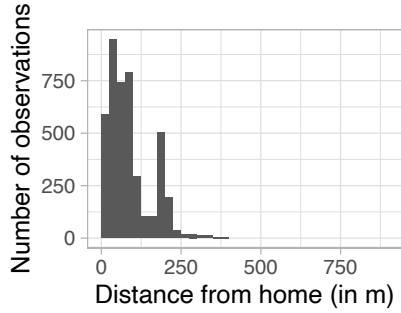

| Radius | Residence time | Proportion of total time | Number of visits |
|--------|----------------|--------------------------|------------------|
| 50m    | 25.6 h         | 65.4%                    | 217              |
| 100m   | 51 h           | 31.2%                    | 91               |
| 150m   | 57.4 h         | 22.6%                    | 24               |
| 200m   | 67.9 h         | 8.4%                     | 42               |
| 250m   | 72.9 h         | 1.7%                     | 6                |

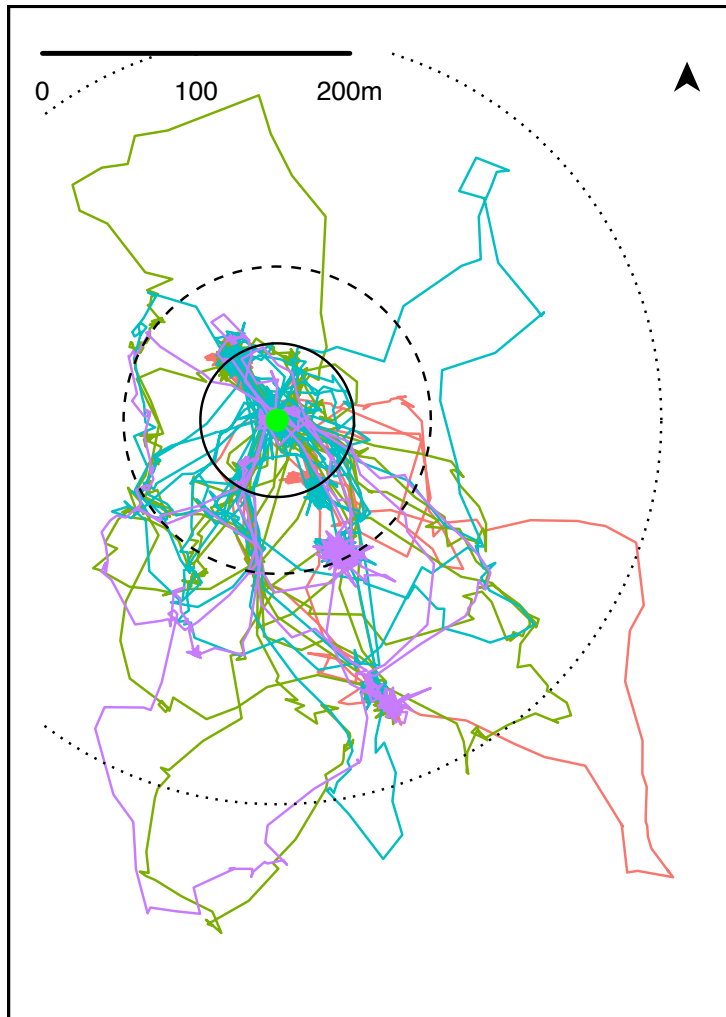

**Fig 28**

|              |                |
|--------------|----------------|
| Neighborhood | Neighborhood A |
| Season       | April          |
| Sex          | F              |
| Age (months) | 10             |

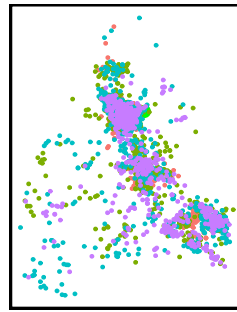

- 2019-04-05
- 2019-04-06
- 2019-04-07
- 2019-04-08

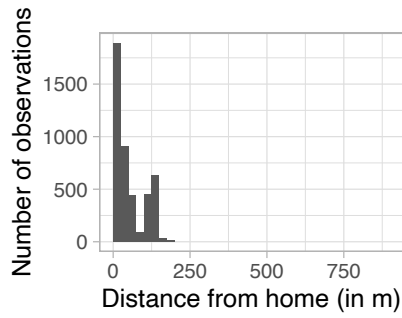

| Radius | Residence time | Proportion of total time | Number of visits |
|--------|----------------|--------------------------|------------------|
| 50m    | 45.8 h         | 37.9%                    | 55               |
| 100m   | 54.7 h         | 25.8%                    | 19               |
| 150m   | 72.8 h         | 1.2%                     | 6                |
| 200m   | 73.7 h         | 0%                       | 0                |
| 250m   | 73.7 h         | 0%                       | 0                |

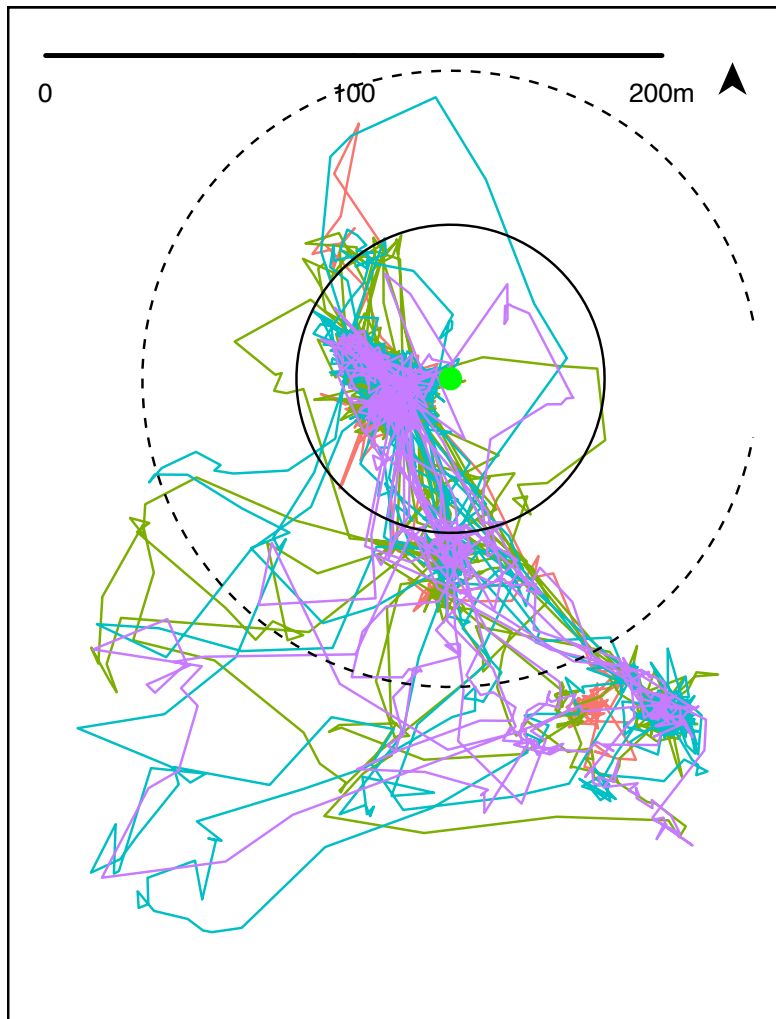

**Fig 29**

|              |                |
|--------------|----------------|
| Neighborhood | Neighborhood A |
| Season       | April          |
| Sex          | F              |
| Age (months) | 10             |

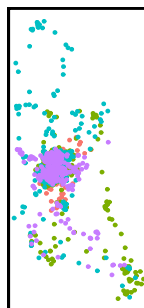

- 2019-04-05
- 2019-04-06
- 2019-04-07
- 2019-04-08

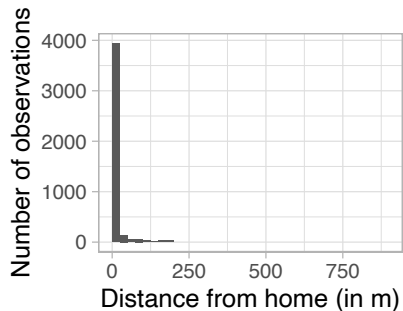

| Radius | Residence time | Proportion of total time | Number of visits |
|--------|----------------|--------------------------|------------------|
| 50m    | 69.3 h         | 5%                       | 16               |
| 100m   | 71.2 h         | 2.5%                     | 7                |
| 150m   | 72 h           | 1.4%                     | 4                |
| 200m   | 73 h           | 0%                       | 0                |
| 250m   | 73 h           | 0%                       | 0                |

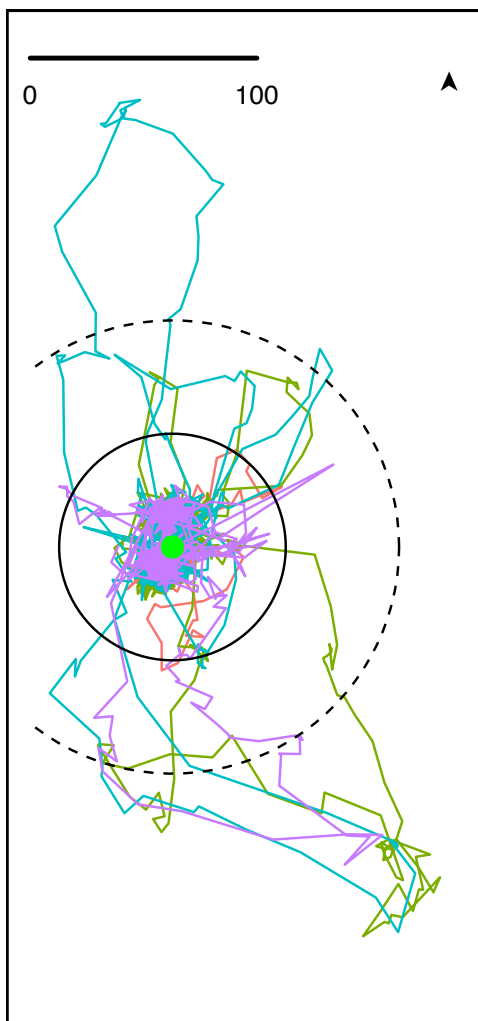

**Fig 30**

|              |                |
|--------------|----------------|
| Neighborhood | Neighborhood A |
| Season       | April          |
| Sex          | M              |
| Age (months) | 9              |

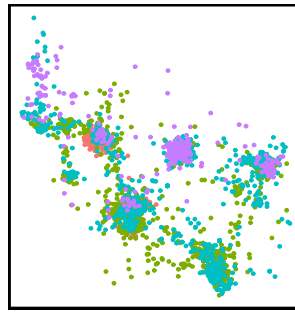

- 2019-04-05
- 2019-04-06
- 2019-04-07
- 2019-04-08

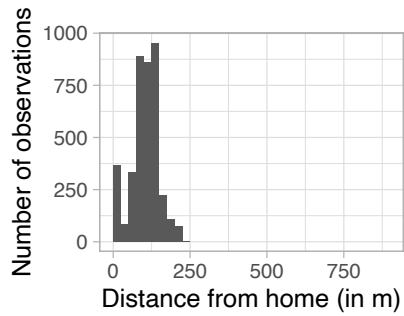

| Radius | Residence time | Proportion of total time | Number of visits |
|--------|----------------|--------------------------|------------------|
| 50m    | 7.2 h          | 88.6%                    | 10               |
| 100m   | 27.9 h         | 56.3%                    | 50               |
| 150m   | 57.6 h         | 9.9%                     | 55               |
| 200m   | 62.6 h         | 1.9%                     | 9                |
| 250m   | 63.9 h         | 0%                       | 0                |

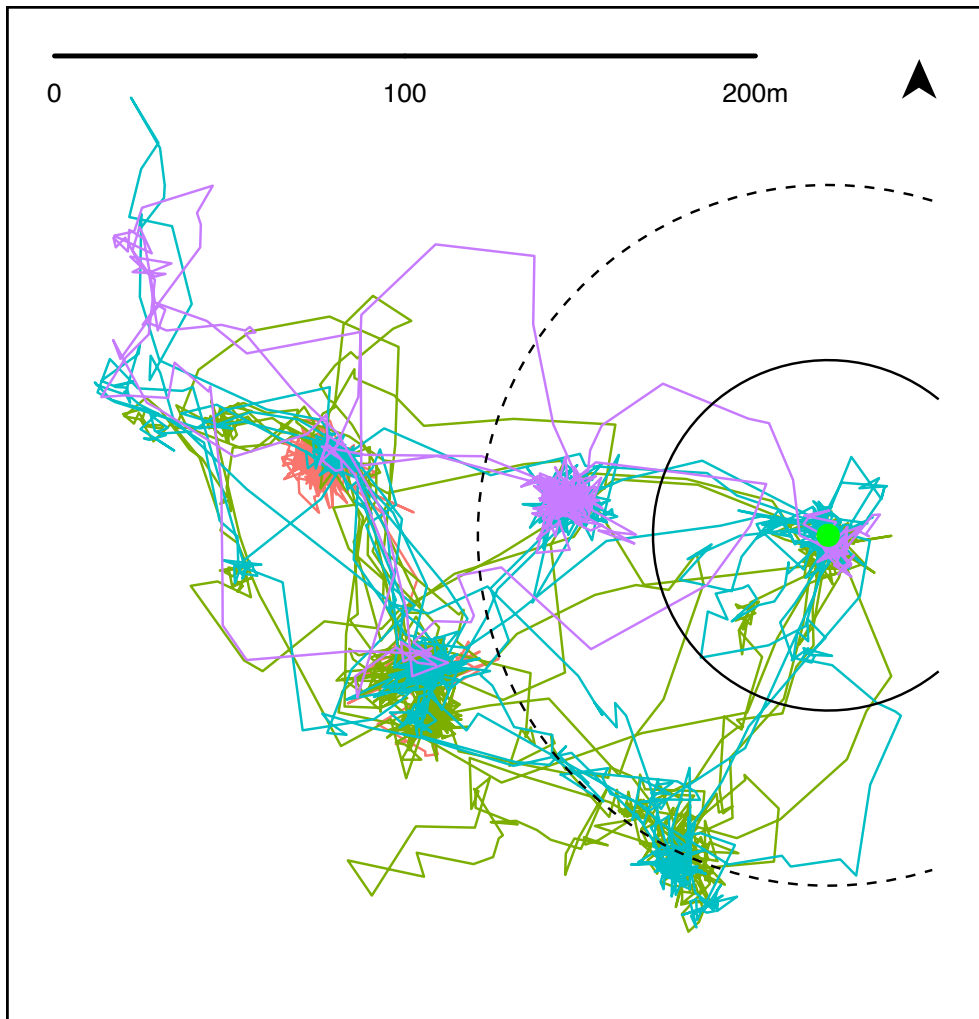

**Pig 31**

|              |                |
|--------------|----------------|
| Neighborhood | Neighborhood A |
| Season       | April          |
| Sex          | F              |
| Age (months) | 10             |

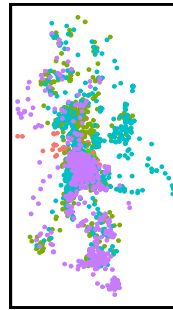

- 2019-04-06
- 2019-04-07
- 2019-04-08
- 2019-04-09

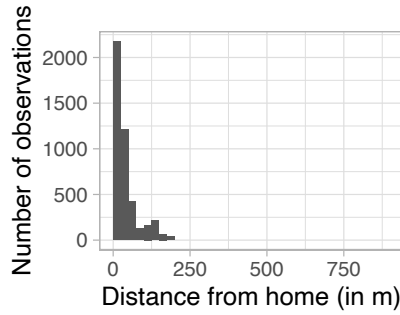

| Radius | Residence time | Proportion of total time | Number of visits |
|--------|----------------|--------------------------|------------------|
| 50m    | 60.4 h         | 22.5%                    | 52               |
| 100m   | 69.8 h         | 10.4%                    | 29               |
| 150m   | 76.2 h         | 2.3%                     | 31               |
| 200m   | 78 h           | 0%                       | 0                |
| 250m   | 78 h           | 0%                       | 0                |

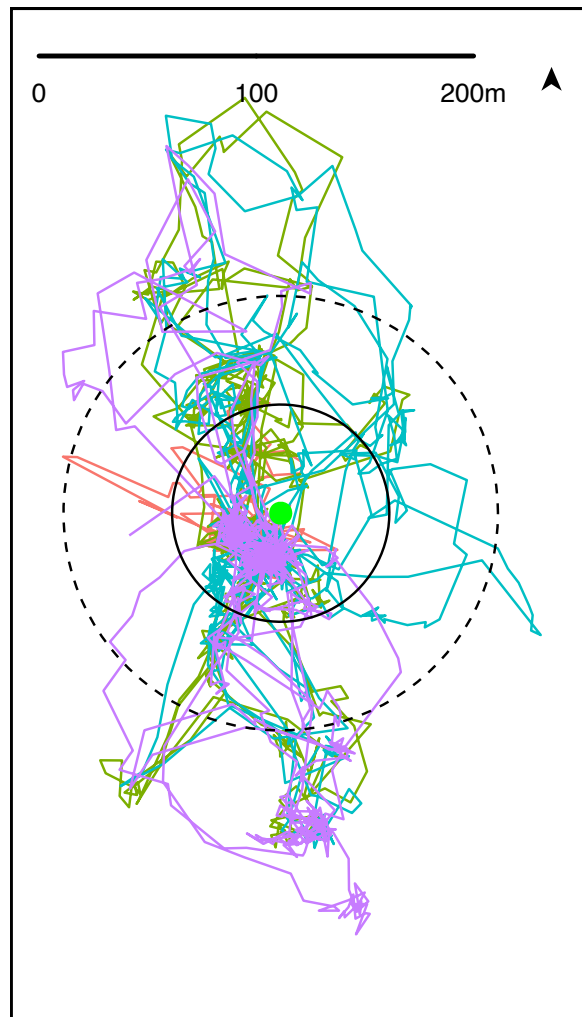



**Fig 32**

|              |                |
|--------------|----------------|
| Neighborhood | Neighborhood A |
| Season       | April          |
| Sex          | M              |
| Age (months) | 7              |

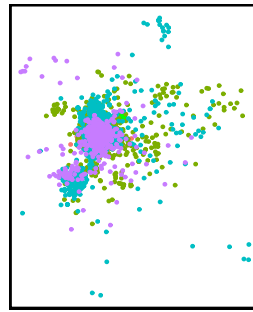

- 2019-04-06
- 2019-04-07
- 2019-04-08
- 2019-04-09

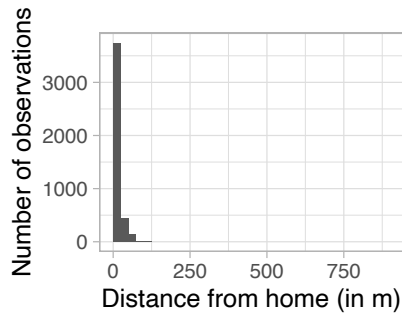

| Radius | Residence time | Proportion of total time | Number of visits |
|--------|----------------|--------------------------|------------------|
| 50m    | 69.5 h         | 3.4%                     | 36               |
| 100m   | 71.9 h         | 0.1%                     | 2                |
| 150m   | 71.9 h         | 0%                       | 0                |
| 200m   | 71.9 h         | 0%                       | 0                |
| 250m   | 71.9 h         | 0%                       | 0                |

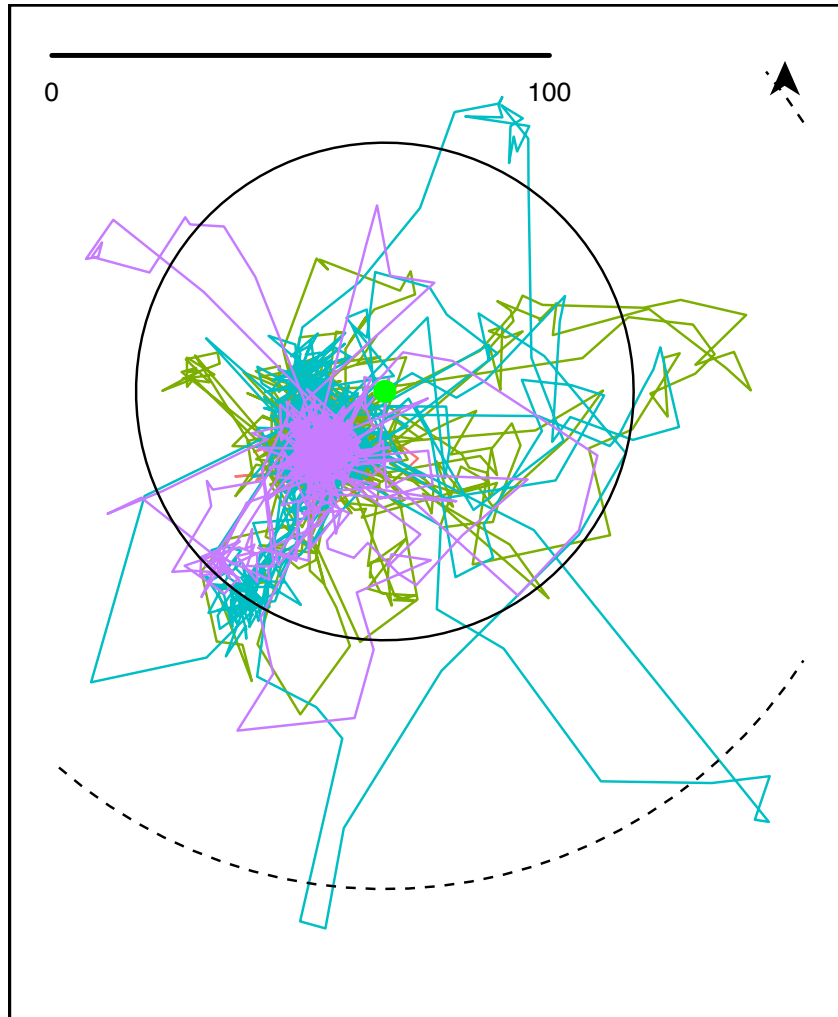

**Fig 33**

|              |                |
|--------------|----------------|
| Neighborhood | Neighborhood B |
| Season       | April          |
| Sex          | F              |
| Age (months) | 13             |

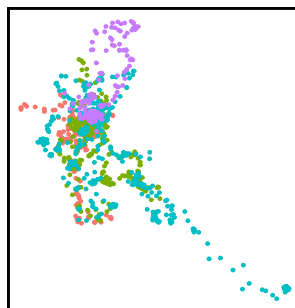

- 2019-04-10
- 2019-04-11
- 2019-04-12
- 2019-04-13

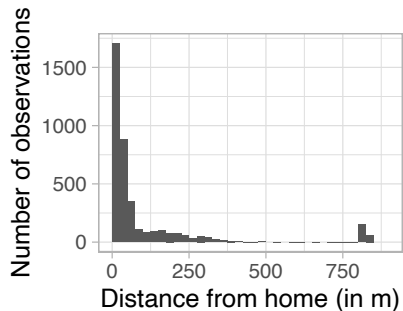

| Radius | Residence time | Proportion of total time | Number of visits |
|--------|----------------|--------------------------|------------------|
| 50m    | 43.6 h         | 35.2%                    | 71               |
| 100m   | 51.5 h         | 23.4%                    | 21               |
| 150m   | 55.2 h         | 18%                      | 19               |
| 200m   | 58.1 h         | 13.6%                    | 23               |
| 250m   | 60.3 h         | 10.3%                    | 8                |

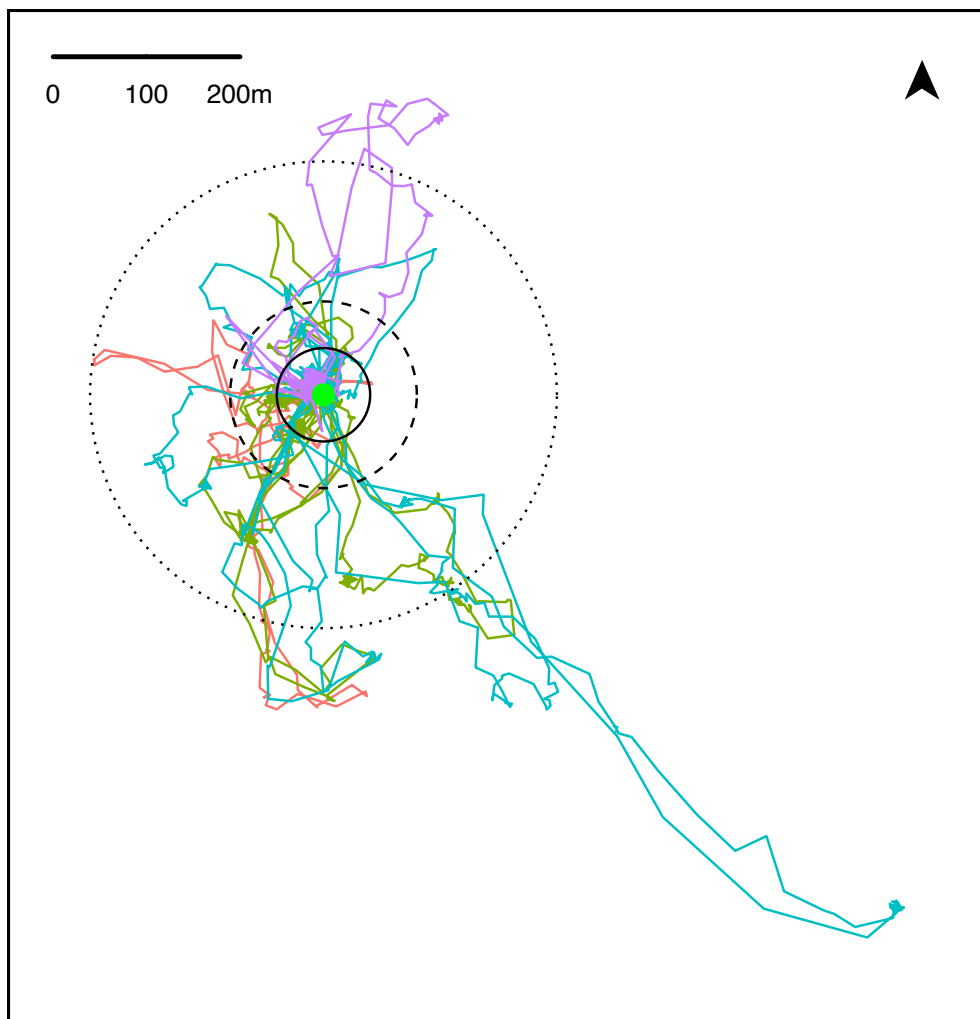

**Fig 34**

|              |                |
|--------------|----------------|
| Neighborhood | Neighborhood B |
| Season       | April          |
| Sex          | F              |
| Age (months) | 11             |

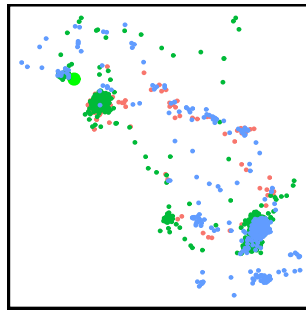

- 2019-04-11
- 2019-04-12
- 2019-04-13

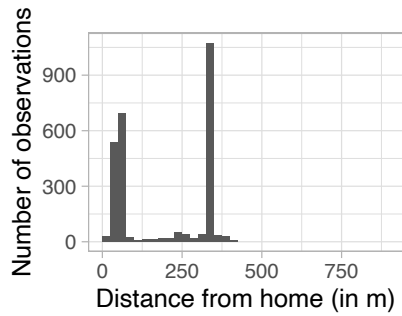

| Radius | Residence time | Proportion of total time | Number of visits |
|--------|----------------|--------------------------|------------------|
| 50m    | 9.5 h          | 79%                      | 142              |
| 100m   | 21.7 h         | 51.9%                    | 5                |
| 150m   | 22.2 h         | 50.8%                    | 5                |
| 200m   | 22.7 h         | 49.8%                    | 5                |
| 250m   | 23.9 h         | 47.1%                    | 9                |

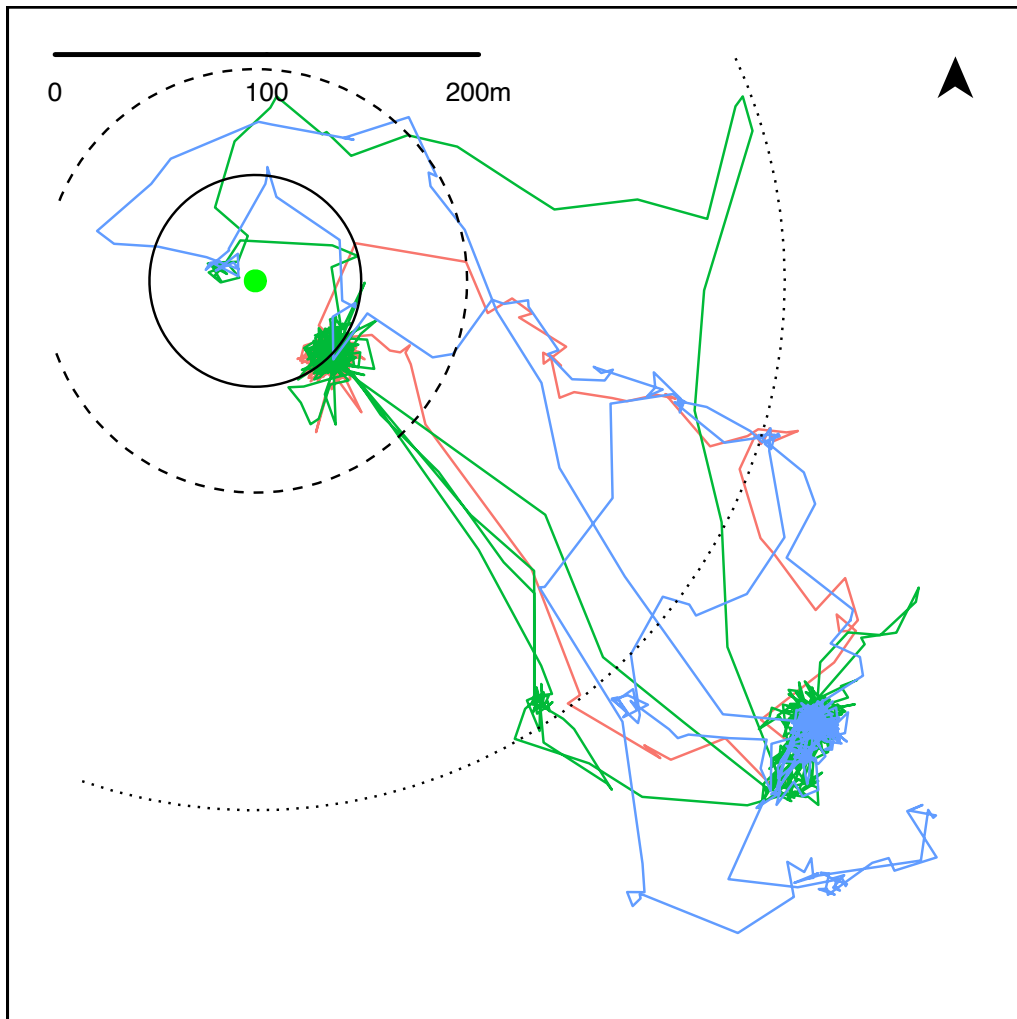

**Pig 35**

|              |                |
|--------------|----------------|
| Neighborhood | Neighborhood B |
| Season       | April          |
| Sex          | F              |
| Age (months) | 54             |

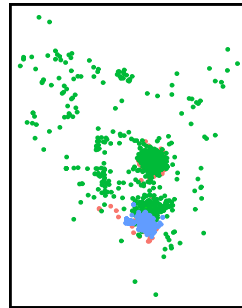

- 2019-04-11
- 2019-04-12
- 2019-04-13

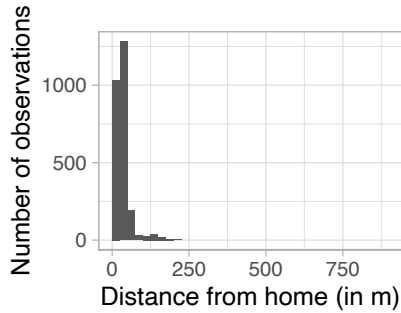

| Radius | Residence time | Proportion of total time | Number of visits |
|--------|----------------|--------------------------|------------------|
| 50m    | 39.4 h         | 11.1%                    | 92               |
| 100m   | 42.7 h         | 3.6%                     | 3                |
| 150m   | 43.8 h         | 1.1%                     | 4                |
| 200m   | 44.3 h         | 0.1%                     | 1                |
| 250m   | 44.3 h         | 0%                       | 0                |

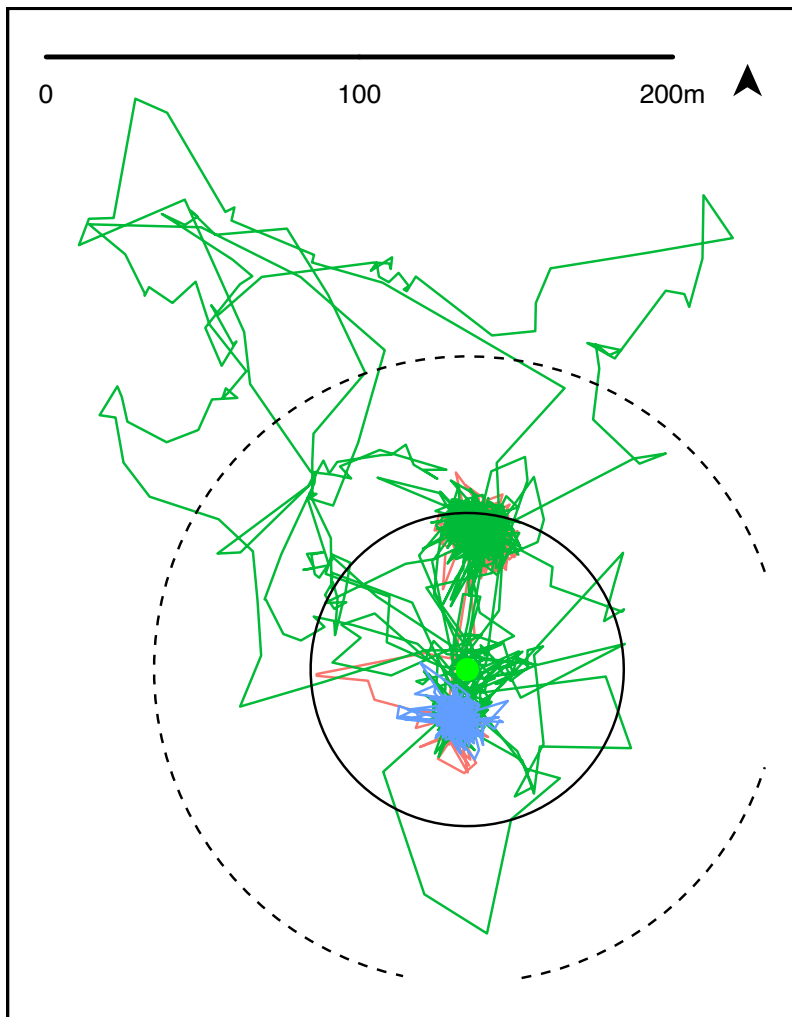

**Fig 36**

|              |                |
|--------------|----------------|
| Neighborhood | Neighborhood B |
| Season       | April          |
| Sex          | F              |
| Age (months) | 33             |

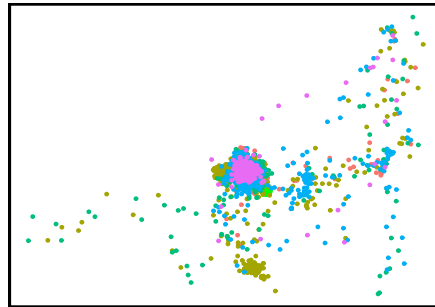

- 2019-04-09
- 2019-04-10
- 2019-04-11
- 2019-04-12
- 2019-04-13

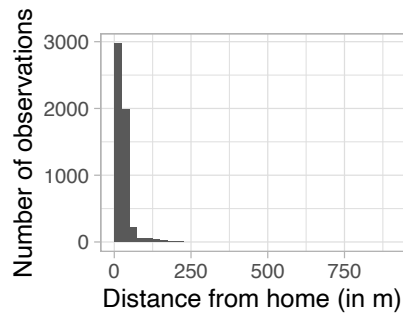

| Radius | Residence time | Proportion of total time | Number of visits |
|--------|----------------|--------------------------|------------------|
| 50m    | 84.3 h         | 7.2%                     | 22               |
| 100m   | 88.7 h         | 2.4%                     | 16               |
| 150m   | 90.2 h         | 0.7%                     | 10               |
| 200m   | 90.8 h         | 0%                       | 1                |
| 250m   | 90.8 h         | 0%                       | 0                |

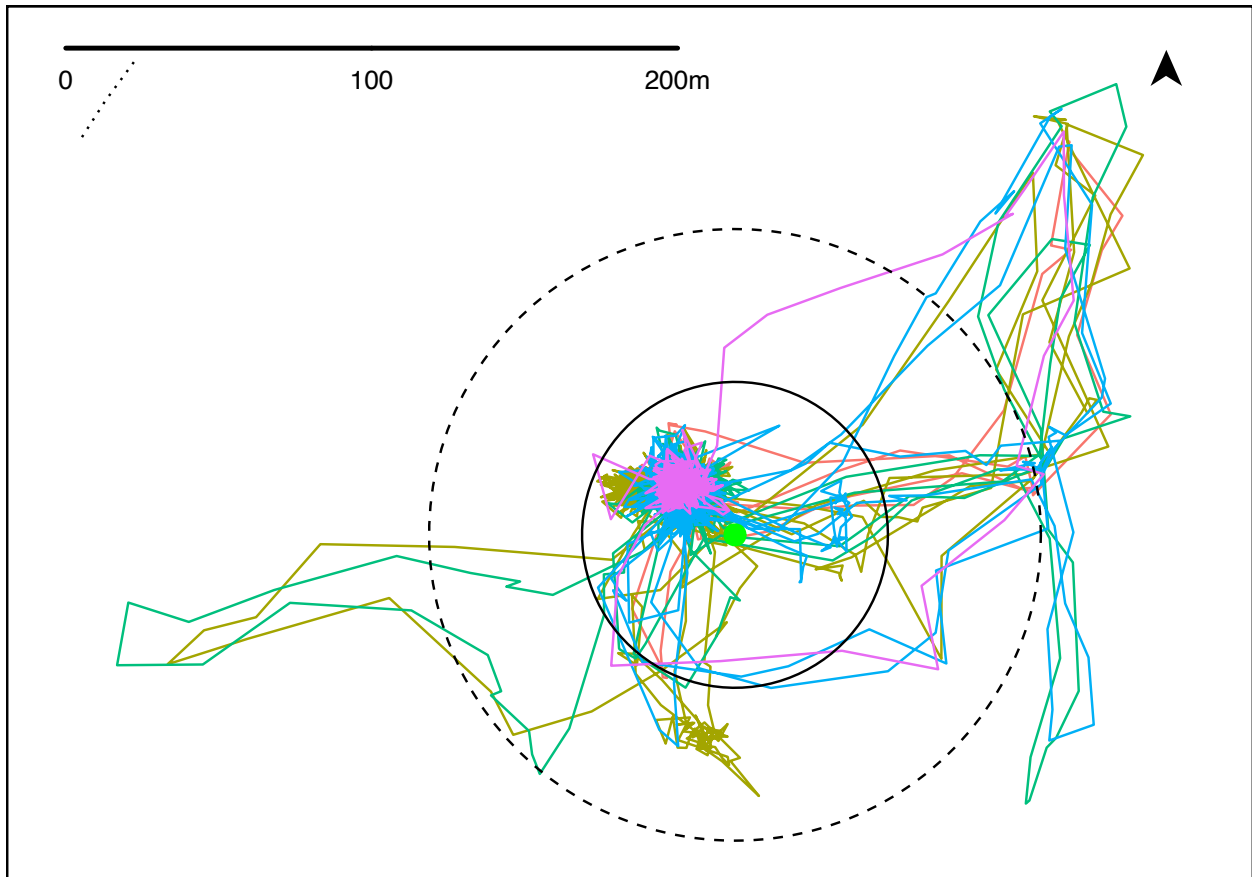

**Fig 37**

|              |                |
|--------------|----------------|
| Neighborhood | Neighborhood B |
| Season       | April          |
| Sex          | F              |
| Age (months) | 60             |

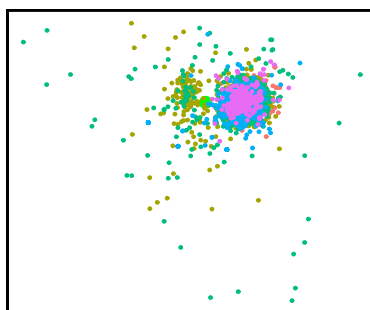

- 2019-04-09
- 2019-04-10
- 2019-04-11
- 2019-04-12
- 2019-04-13

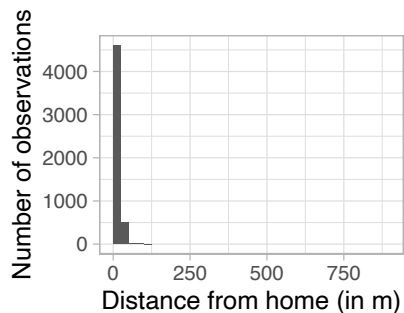

| Radius | Residence time | Proportion of total time | Number of visits |
|--------|----------------|--------------------------|------------------|
| 50m    | 87.6 h         | 0.4%                     | 6                |
| 100m   | 87.9 h         | 0%                       | 1                |
| 150m   | 87.9 h         | 0%                       | 0                |
| 200m   | 87.9 h         | 0%                       | 0                |
| 250m   | 87.9 h         | 0%                       | 0                |

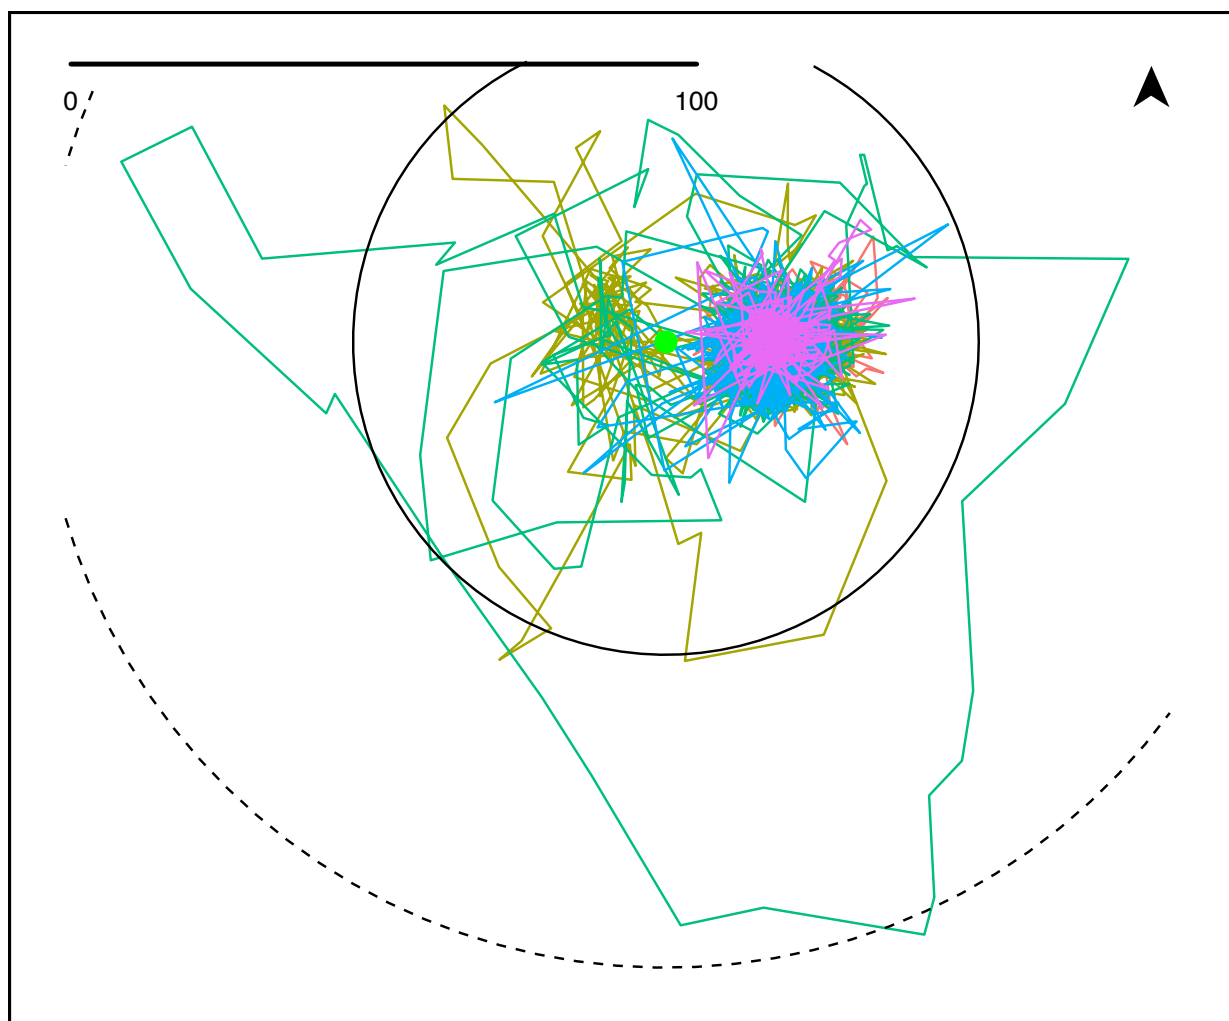

**Fig 38**

|              |                |
|--------------|----------------|
| Neighborhood | Neighborhood B |
| Season       | April          |
| Sex          | F              |
| Age (months) | 15             |

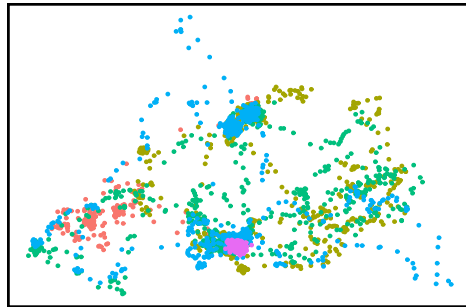

- 2019-04-09
- 2019-04-10
- 2019-04-11
- 2019-04-12
- 2019-04-13

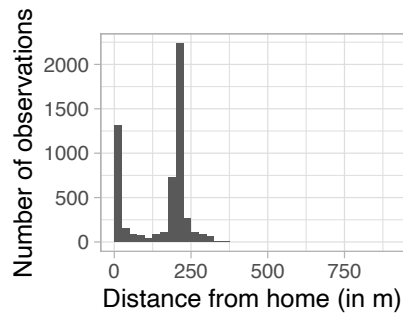

| Radius | Residence time | Proportion of total time | Number of visits |
|--------|----------------|--------------------------|------------------|
| 50m    | 25 h           | 72.3%                    | 20               |
| 100m   | 27.6 h         | 69.3%                    | 16               |
| 150m   | 29.8 h         | 66.9%                    | 18               |
| 200m   | 43.8 h         | 51.4%                    | 46               |
| 250m   | 85.6 h         | 5%                       | 16               |

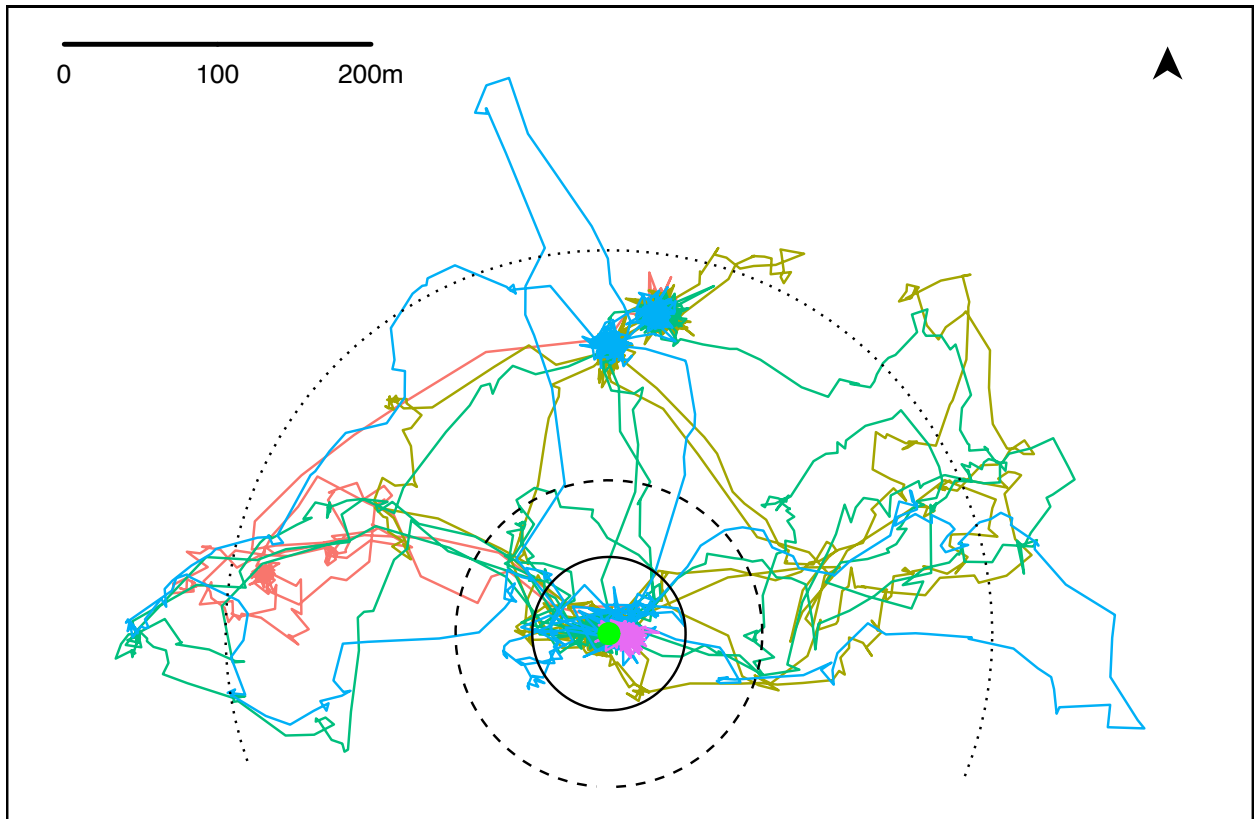

**Fig 39**

|              |                |
|--------------|----------------|
| Neighborhood | Neighborhood B |
| Season       | April          |
| Sex          | F              |
| Age (months) | 28             |

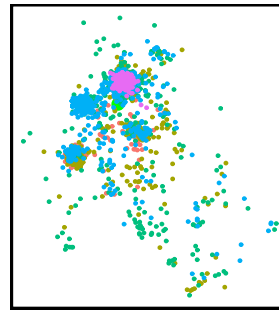

- 2019-04-09
- 2019-04-10
- 2019-04-11
- 2019-04-12
- 2019-04-13

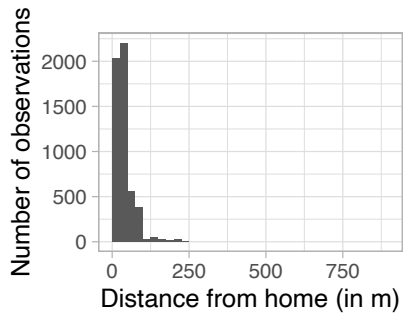

| Radius | Residence time | Proportion of total time | Number of visits |
|--------|----------------|--------------------------|------------------|
| 50m    | 71.2 h         | 20%                      | 44               |
| 100m   | 86.9 h         | 2.5%                     | 12               |
| 150m   | 88.1 h         | 1.2%                     | 8                |
| 200m   | 88.7 h         | 0.5%                     | 5                |
| 250m   | 89.1 h         | 0%                       | 0                |

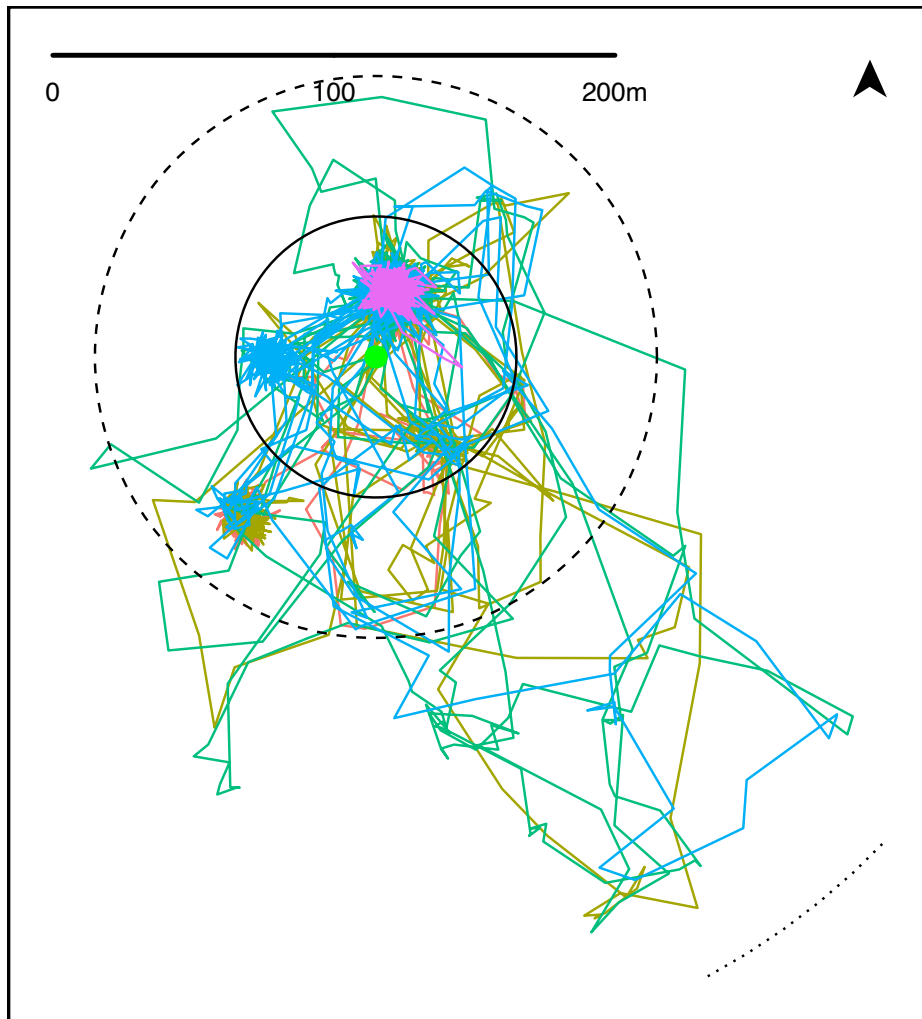



**Fig 40**

|              |                |
|--------------|----------------|
| Neighborhood | Neighborhood B |
| Season       | April          |
| Sex          | F              |
| Age (months) | 10             |

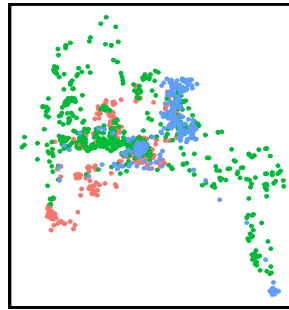

- 2019-04-11
- 2019-04-12
- 2019-04-13

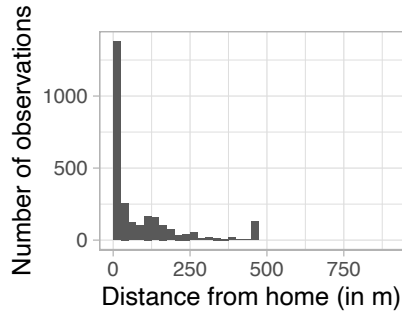

| Radius | Residence time | Proportion of total time | Number of visits |
|--------|----------------|--------------------------|------------------|
| 50m    | 27.7 h         | 39.2%                    | 21               |
| 100m   | 31.4 h         | 31.1%                    | 24               |
| 150m   | 36.9 h         | 19%                      | 23               |
| 200m   | 39.9 h         | 12.4%                    | 11               |
| 250m   | 41.2 h         | 9.5%                     | 9                |

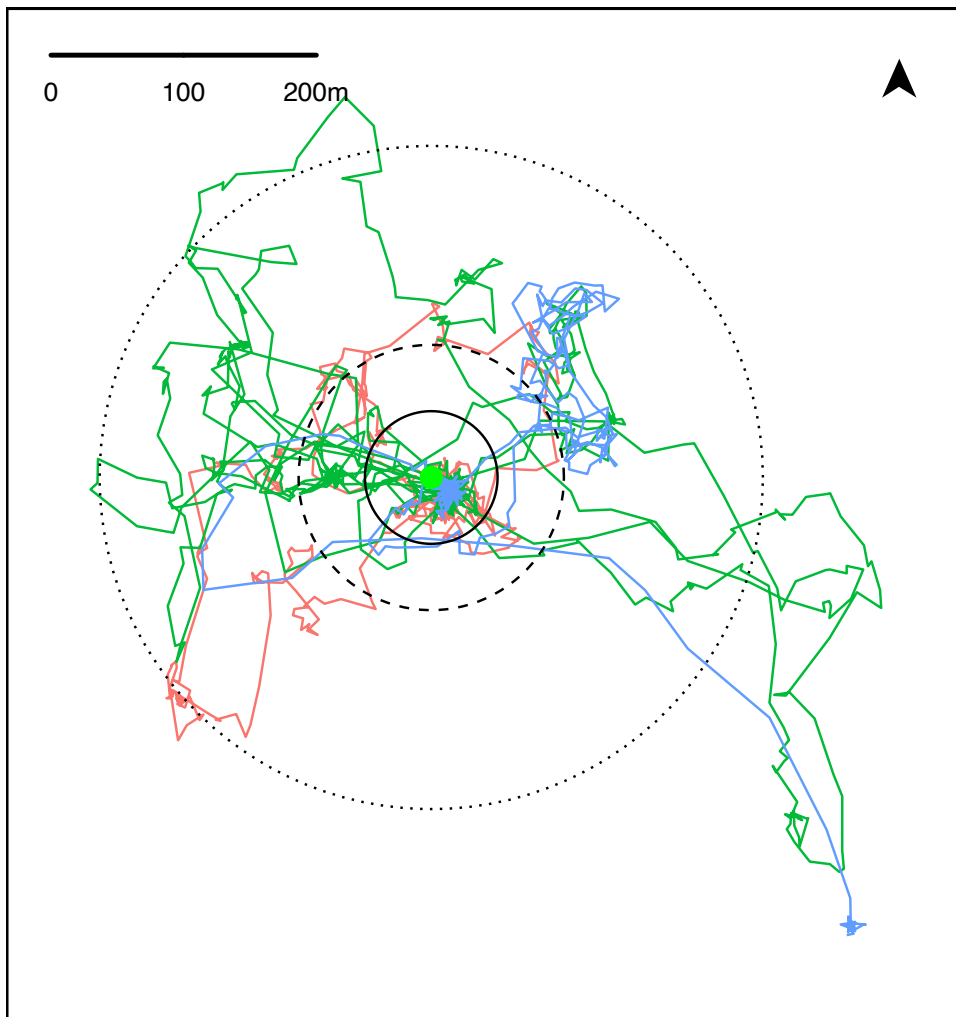

**Fig 41**

|              |                |
|--------------|----------------|
| Neighborhood | Neighborhood B |
| Season       | April          |
| Sex          | M              |
| Age (months) | 6              |

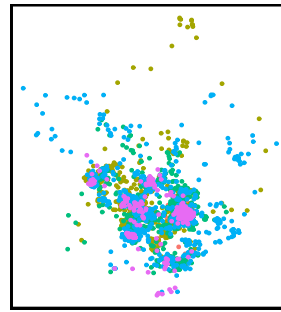

- 2019-04-09
- 2019-04-10
- 2019-04-11
- 2019-04-12
- 2019-04-13

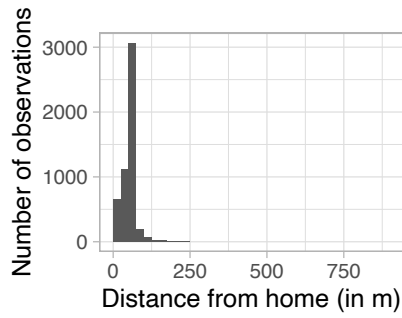

| Radius | Residence time | Proportion of total time | Number of visits |
|--------|----------------|--------------------------|------------------|
| 50m    | 29.8 h         | 65.7%                    | 108              |
| 100m   | 84.7 h         | 2.7%                     | 19               |
| 150m   | 86.3 h         | 0.8%                     | 5                |
| 200m   | 86.8 h         | 0.3%                     | 2                |
| 250m   | 87 h           | 0%                       | 0                |

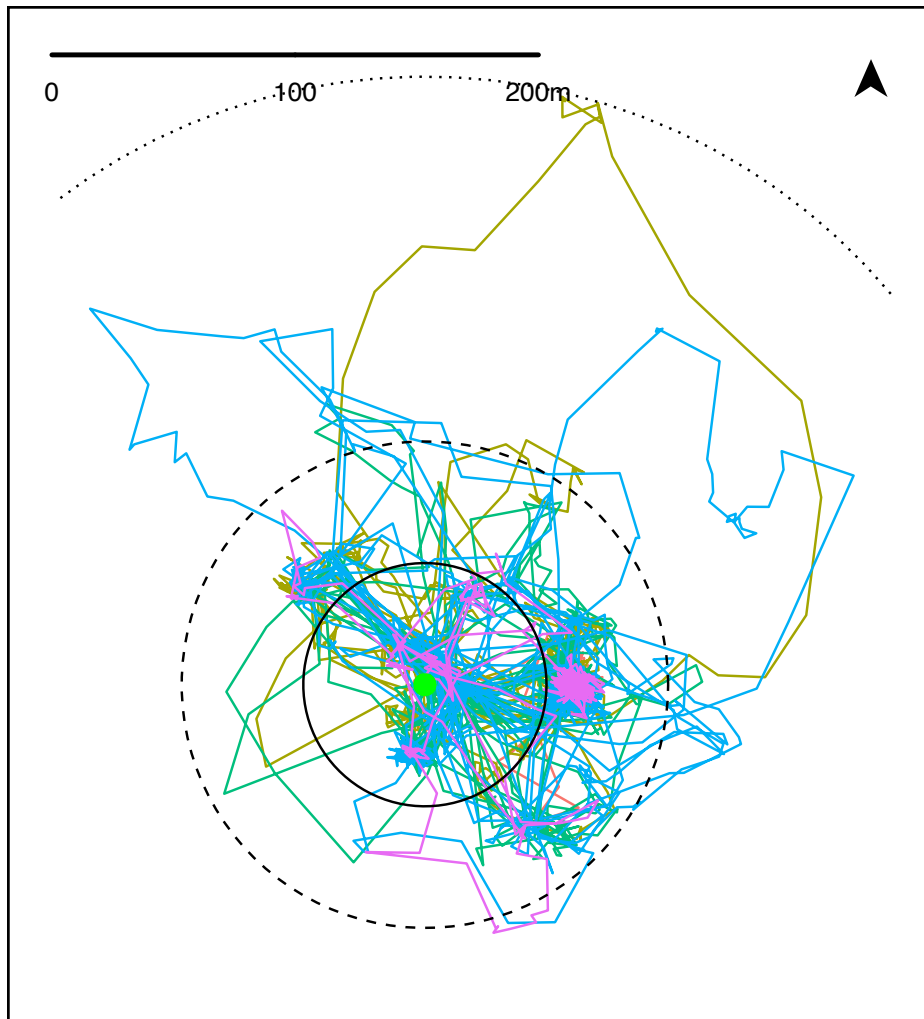

**Fig 42**

|              |                |
|--------------|----------------|
| Neighborhood | Neighborhood B |
| Season       | April          |
| Sex          | F              |
| Age (months) | 3              |

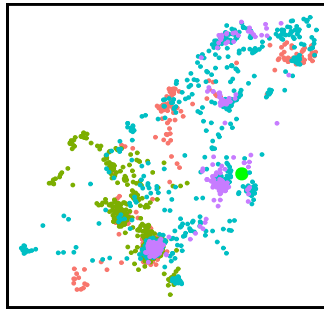

- 2019-04-10
- 2019-04-11
- 2019-04-12
- 2019-04-13

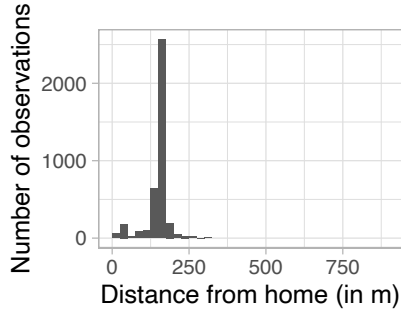

| Radius | Residence time | Proportion of total time | Number of visits |
|--------|----------------|--------------------------|------------------|
| 50m    | 4.6 h          | 93.5%                    | 7                |
| 100m   | 6.4 h          | 90.8%                    | 20               |
| 150m   | 18.9 h         | 73%                      | 213              |
| 200m   | 68.4 h         | 2.6%                     | 14               |
| 250m   | 69.6 h         | 0.8%                     | 3                |

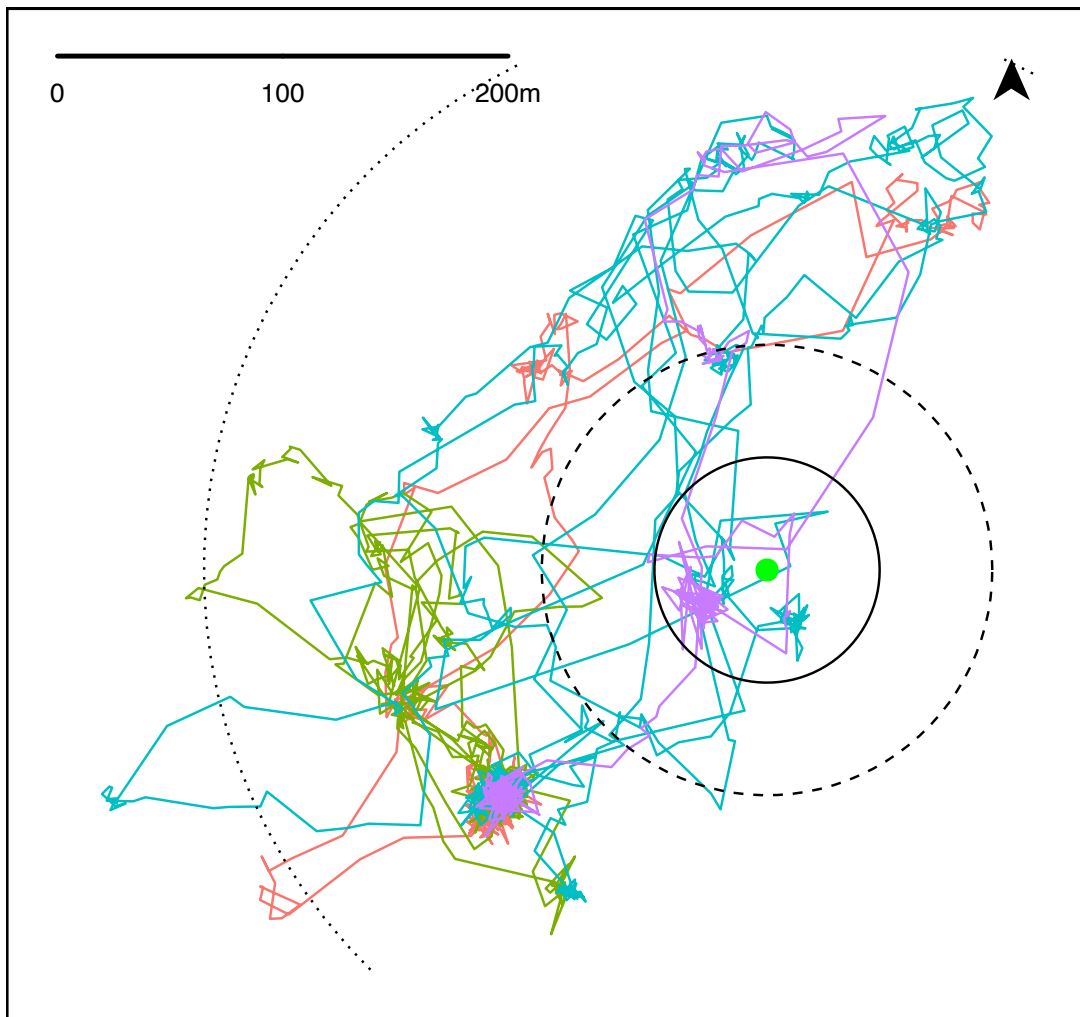

**Fig 43**

|              |                |
|--------------|----------------|
| Neighborhood | Neighborhood B |
| Season       | April          |
| Sex          | F              |
| Age (months) | 10             |

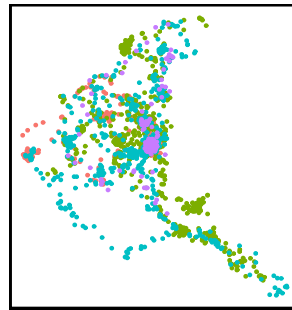

- 2019-04-10
- 2019-04-11
- 2019-04-12
- 2019-04-13

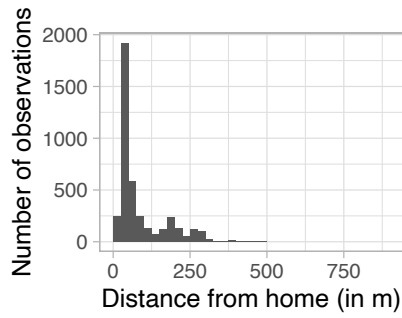

| Radius | Residence time | Proportion of total time | Number of visits |
|--------|----------------|--------------------------|------------------|
| 50m    | 37.4 h         | 45.6%                    | 172              |
| 100m   | 51.1 h         | 25.7%                    | 24               |
| 150m   | 54.5 h         | 20.7%                    | 28               |
| 200m   | 60.6 h         | 11.9%                    | 17               |
| 250m   | 63.7 h         | 7.4%                     | 19               |

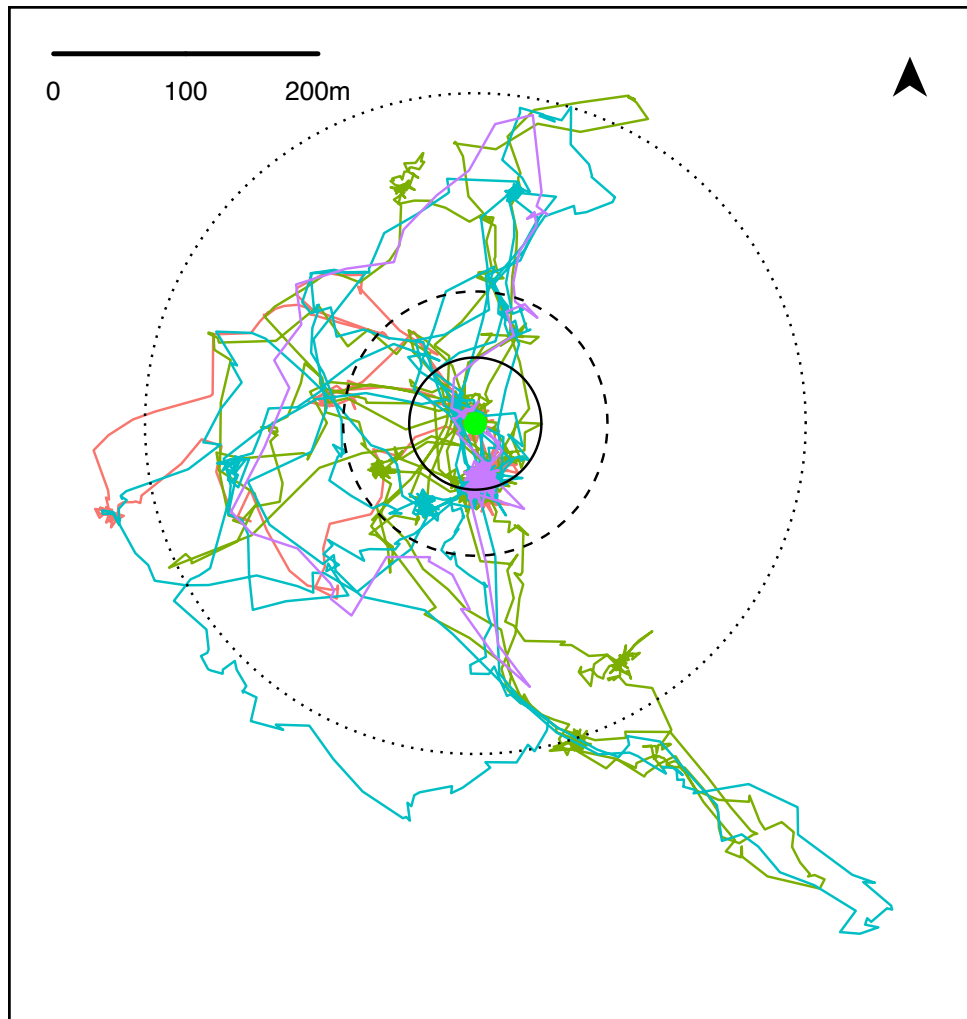

Supplement: 13071_2022_5264_MOESM2_ESM.pdf [file 13071_2022_5264_MOESM2_ESM.pdf]
